# Supplementary material for: FGFR blockade inhibits targeted therapy-tolerant persister cells in basal FGFR1 and FGF2 high expressing cancers with driver oncogenes
Source: Research Square preprint supplement (doi:10.21203/rs.3.rs-2357127/v1), 2023-01-31
Supplement: Supplementary file 1 [file fe86aca42f607e1ece1b8c74.xlsx]

## Sheet: Appendix 1
	Appendix 1:Anti-cancer compound library screening in NCI-H2228 parental and DTP cells.
Index	Compound	Targets	Viability of parental cells	Viability of DTP cells	Anti-proliferative effect on DTP cells
1	Parenabol	Androgen Receptor	1.059	1.045	0.98678
2	Defactinib	FAK	1.028	1.006	0.978599
3	ML-7 hydrochloride	PKA; PKC; MLCK	0.9837	1.064	1.08163
4	Itopride hydrochloride	AChE	0.9953	0.9747	0.979303
5	PX12	TRX (HT-29 cells); TRX (MCF-7)	0.9557	0.9838	1.0294
6	Enasidenib	IDH2	0.9843	0.9596	0.974906
7	A1210477	Mcl-1	1.051	0.9594	0.912845
8	Almotriptan Malate	5-HT1B/1D	0.9684	0.96	0.991326
9	CL387785	EGFR	0.9617	0.829	0.862015
10	1 nM-PP1	CDK7	0.946	0.8531	0.901797
11	GW 9662	PPARα; PPARγ; PPARδ	1.083	0.9949	0.918652
12	RPI1	Met; RET; CTND1; DCDB2; PLCγ	1.055	0.9525	0.902844
13	GW 4064	FXR	1.035	1.081	1.04444
14	SC202671	JNK2; JNK3	0.3927	0.7892	2.00968
15	BIBR 1532	Telomerase	0.9795	0.9416	0.961307
16	Tenovin-1	Mdm2; p53	1.048	0.946	0.902672
17	CaMKP Inhibitor	CaMKP	1.164	0.8995	0.772766
18	5-Aminolevulinic acid hydrochloride	Autophagy	0.9795	0.9786	0.999081
19	Liothyronine sodium	TRα; TRβ	1.072	1.022	0.953358
20	EVP-6124 hydrochloride	α7 nAChR	1.069	0.9065	0.847989
21	Epirubicin hydrochloride	Topo	0.2457	0.7674	3.12332
22	Daurisoline	Others	1.113	1.068	0.959569
23	Brassinolide	plant growth modulator	1.083	1.015	0.937211
24	Acamprosate calcium	GABAR	1.117	1.028	0.920322
25	Apoptosis Activator 2	Caspase-3	1.132	1.054	0.931095
26	ICG001	Wnt/β-catenin	1.111	1.068	0.961296
27	BIIB021	HSP90	0.2767	0.8408	3.03867
28	LXR623	LXRα; LXRβ	1.045	1.035	0.990431
29	LCZ696	RAAS	1.131	1.028	0.90893
30	Benzyl alcohol	ALDH	1.05	0.9874	0.940381
31	cis-Anethol	Others	1.09	1.033	0.947706
32	Thiodiglycol	ADH	1.054	1.032	0.979127
33	Retinyl acetate	VA	1.037	1.069	1.03086
34	Latanoprost	prostanoid selective FP receptor; retinoid X receptor α	1.094	1.085	0.991773
35	N,N-Diethyl-m-toluamide	AChE	1.046	0.9999	0.955927
36	2-Chloropyrazine	CDK2	1.038	0.9619	0.926686
37	Anestan	Glycine receptor; GABAR; NMDA receptor; Potassium Channel	1.086	1.039	0.956722
38	JAK2 Inhibitor V	JAK2; JAK2 (V617F)	1.077	1.035	0.961003
39	Propofol	GABAR; Sodium Channel	0.9759	1.08	1.10667
40	Tyloxapol	NF-κB; LPL	1.057	0.9663	0.914191
41	Etidronate	HAP; PTPase S; V-type proton ATPase catalytic subunit	1.134	1.108	0.977072
42	Etofenamate	COX	1.104	1.096	0.992754
43	(-)-Cotinine	Nicotinic Receptor	1.129	1.084	0.960142
44	Beta-Tetralone	CYP2A	1.156	0.9496	0.821453
45	Muscone	MMP-9; P-gp (P-glycoprotein)	1.129	1.086	0.961913
46	Pargyline	MAO	1.112	1.122	1.00899
47	Betahistine dihydrochloride	H3 receptor	1.096	1.192	1.08759
48	2-(Hydroxymethyl)pyridine	PDE	1.161	1.119	0.963824
49	Vitamin E	GST Mu 3; GST omega-1; GSTP; SEC14-like protein; PKC; VE	1.099	1.051	0.956324
50	Nikethamide	GABAR	1.103	1.084	0.982774
51	2-Aminoethanethiol	Cystine; NPYR2; Somatostatin Receptor	1.089	1.033	0.948577
52	Acetylcholine chloride	AChR	1.058	1.172	1.10775
53	Benzyl isothiocyanate	Others	1.132	1.134	1.00177
54	Clofibrate	PPARα	1.142	1.083	0.948336
55	4-Methylpyrazole	ADH; CAT	1.112	1.118	1.0054
56	Pempidine	Nicotinic Receptor; ganglion	1.148	1.116	0.972125
57	Phytic acid	Endogenous Metabolite; Xanthine Oxidase	1.192	1.13	0.947987
58	Ethoxyquin	HSP90	1.119	1.056	0.9437
59	TTNPB	RARα; RARβ; RARγ; RARγ	0.6161	0.8838	1.43451
60	Cinchophen	COX	0.9952	0.9682	0.97287
61	Carvedilol	Adrenergic Receptor; HIF; E-selectin; NADPH; Vcam; Potassium Channel; VEGFR	1.086	1.035	0.953039
62	Anastrozole	Aromatase	1.1	1.125	1.02273
63	Sunitinib Malate	Kit; FLT3; PDGFRβ; VEGFR2	1.019	0.9873	0.968891
64	Ethaverine hydrochloride	MAO	1.101	1.05	0.953678
65	Probenecid	TRPV2	1.146	1.069	0.93281
66	Proflavine Hemisulfate	DNA mutation; LfrR; QacR; Thrombin	1.133	1.228	1.08385
67	Alverine citrate	5-HT	1.157	1.101	0.951599
68	Allylthiourea	MAO	1.118	1.115	0.997317
69	Clofazimine	DNA; CzcO-like	1.088	1.138	1.04596
70	Pheniramine maleate	HT	1.124	1.095	0.974199
71	Indometacin	COX-1; COX-1; COX-2; PDE2; PLA2	1.129	1.018	0.901683
72	Menadione	Thrombin; VK	1.168	1.123	0.961473
73	L-Tryptophan	Amino Acids and Derivatives	1.149	1.099	0.956484
74	Glucosamine	Chitosanase; MMP-9; NF-κB; IFγ; TNF-α	1.111	1.157	1.0414
75	Dabigatran etexilate	Thrombin	1.131	1.143	1.01061
76	Gliquidone	Potassium Channel	1.129	1.104	0.977857
77	Sulindac	COX	1.144	1.07	0.935315
78	Fluoxetine	Sert (Sodium-dependent); MRP1	1.16	1.132	0.975862
79	Pentetic Acid	Heavy metal ion	1.102	1.174	1.06534
80	Gabexate mesylate	Serine Protease	1.151	1.038	0.901825
81	Minoxidil	COX-1; Potassium Channel	1.142	1.083	0.948336
82	Pasiniazid	COX; NADPH	1.16	1.083	0.933621
83	Benzethonium chloride	α4β2 nAChRs; α7 nAChRs	1.18	1.099	0.931356
84	Linezolid	AOA; AOB	1.215	1.109	0.912757
85	Bicalutamide	Androgen Receptor	1.179	1.206	1.0229
86	Erlotinib	EGFR	1.07	1.099	1.0271
87	Amodiaquine hydrochloride	histamine N-methyl transferase	1.234	1.195	0.968395
88	Loxoprofen	COX	1.202	1.206	1.00333
89	Phenylephrine hydrochloride	α1-adrenergic receptor	1.055	1.073	1.01706
90	Salicoside	COX	1.092	1.039	0.951465
91	Artesunate	STAT	1.175	1.125	0.957447
92	Edetate Trisodium	metal ion	1.128	1.153	1.02216
93	D-Mannitol	MDH	1.126	1.164	1.03375
94	Moxisylyte hydrochloride	Adrenergic Receptor	1.146	1.187	1.03578
95	Econazole	14-α Demethylase	1.105	1.214	1.09864
96	Bismuth subsalicylat	COX-1; COX-2	1.179	1.181	1.0017
97	Flopropione	5-HT1A	1.106	1.174	1.06148
98	Fenspiride hydrochloride	PDE3; PDE4	1.117	1.234	1.10474
99	Thioridazine hydrochloride	5-HT; Adrenergic Receptor; Dopamine; Potassium Channel	1.142	1.154	1.01051
100	Ellagic acid	Carbonic anhydrase; CK2; Smoothened; PKA; PKC; Syk	1.116	1.038	0.930108
101	Cilostazol	PDE3	1.187	1.14	0.960404
102	Promethazine	5-HT; mAChR; Adrenergic Receptor; CAM; D2; H1 receptor	1.113	1.181	1.0611
103	Sulfinpyrazone	COX; cMOAT	1.109	1.175	1.05951
104	Guanidine hydrochloride	Arginase; Lysozyme; Ribonuclease pancreatic; Argininosuccinate synthase	1.13	1.189	1.05221
105	Atropine	mAChR	1.178	1.273	1.08065
106	Celecoxib	COX-2	1.144	1.227	1.07255
107	Naphazoline hydrochloride	Adrenergic Receptor	1.123	1.194	1.06322
108	Acexamic Acid	Amino Acids and Derivatives; COX	1.078	1.224	1.13544
109	Homatropine Methylbromide	mAChR (SHR-E); mAChR (WKY-E)	1.083	1.216	1.12281
110	Edaravone	Free radical scavengers	1.109	1.104	0.995491
111	Estradiol benzoate	mERα; hERα	1.145	1.148	1.00262
112	Eprosartan Mesylate	AT1 receptor	1.133	1.085	0.957635
113	Mercaptopurine	IMPDH; HPRT	0.8729	1.005	1.15133
114	Flubendazole	microtubule	0.866	1.162	1.3418
115	Atenolol	β1-adrenergic receptor; β2-adrenergic receptor	1.103	1.166	1.05712
116	Cinchonine	P-gp (P-glycoprotein)	1.143	1.169	1.02275
117	Ethamsylate	Prostaglandin Receptor	1.167	1.2	1.02828
118	Aspirin	COX-1; COX-2	1.164	1.153	0.99055
119	Salicylamide	COX-1; COX-2	1.098	1.157	1.05373
120	Heptaminol hydrochloride	Others	0.996	1.032	1.03614
121	Adiphenine hydrochloride	Nicotinic Receptor	1.174	1.076	0.916525
122	Xylometazoline hydrochloride	α1A-adrenergic receptor; α1B-adrenergic receptor; α1D-adrenergic receptor; α2A-adrenergic receptor; α2B-adrenergic receptor; α2C-adrenergic receptor	1.183	1.036	0.87574
123	Pentoxifylline	A2; PDE	1.114	1.216	1.09156
124	Quinestrol	ER	1.146	1.16	1.01222
125	Dapoxetine HCl	5-HT	1.156	1.252	1.08304
126	Enoxolone	Dehydrogenase	1.154	1.196	1.0364
127	Dienestrol	ER	1.15	1.127	0.98
128	Cortisone acetate	Glucocorticoid Receptor	1.183	1.263	1.06762
129	Miltefosine	PKC; Akt	1.139	1.156	1.01493
130	Ziprasidone hydrochloride monohydrate	5-HT transporter; 5-HT1A; 5-HT1B; 5-HT1D; 5-HT2A; 5-HT2C; 5-HT6; 5-HT7; α1A-adrenergic receptor; α2A-adrenergic receptor; D1; D2; D3; H1 receptor; norepinephrine transporter (NET)	1.096	1.127	1.02828
131	Primidone	nAChR; GABAR; GluR2; Sodium Channel	1.158	1.084	0.936097
132	Haloperidol	5-HT; Dopamine	1.19	1.126	0.946218
133	Sulfalen	DHPS	1.174	1.253	1.06729
134	4-Amino-3-hydroxybutyric Acid	Others	1.168	1.134	0.97089
135	Procainamide hydrochloride	AChR; DNA (cytosine-5)-methyltransferase 1; Sodium Channel	1.163	1.161	0.99828
136	Sodium 4-aminosalicylate dihydrate	Free radical scavengers; NF-κB	1.18	1.195	1.01271
137	Taurine	LDL; VLDL	1.208	1.217	1.00745
138	Toremifene	ER	1.151	1.186	1.03041
139	4-Aminoantipyrine	COX	1.083	1.176	1.08587
140	Urethane	α4β2 nAChR; glycine receptors; GABAR; AMPA; NMDA receptor	1.032	0.9828	0.952326
141	Hydroxyzine Pamoate	H1 receptor	1.117	1.056	0.945389
142	Disulfiram	ALDH1; DBH	0.7534	0.9833	1.30515
143	Glafenine	COX	1.094	1.142	1.04388
144	Famprofazone	COX-1; COX-2	1.099	1.095	0.99636
145	2-Ethoxybenzamide	COX	1.182	1.188	1.00508
146	Diphenylpyraline hydrochloride	H1 receptor	1.149	1.126	0.979983
147	Clofibric acid	PPAR	1.138	1.139	1.00088
148	Fluphenazine hydrochloride	Dopamine	1.103	1.173	1.06346
149	Uracil	RNA	1.131	1.164	1.02918
150	isoleucine	Amino Acids and Derivatives	1.161	1.148	0.988803
151	Acetaminophen	COX-1; COX-2	1.15	1.094	0.951304
152	Urapidil hydrochloride	5-HT; α-adrenergic receptor	1.096	1.099	1.00274
153	Cetirizine dihydrochloride	H1 receptor	1.2	1.193	0.994167
154	Alfuzosin hydrochloride	α-adrenergic receptor	1.12	1.175	1.04911
155	Antazoline hydrochloride	H1 receptor	1.111	1.128	1.0153
156	Ipratropium bromide monohydrate	mAChR	1.11	1.207	1.08739
157	Bendamustine hydrochloride	DNA synthesis	1.145	1.147	1.00175
158	Mebhydrolin napadisylate	HT; mAChR	1.168	1.063	0.910103
159	Balofloxacin	DNA gyrase	1.081	1.121	1.037
160	Suplatast tosilate	Th2 cytokine	1.072	0.9524	0.888433
161	Trichlormethiazide	Na+/K+-ATPase; Carbonic anhydrase	1.068	1.055	0.987828
162	Glimepiride	SUR1; SUR2A; SUR2B	1.153	1.193	1.03469
163	Sanguinarine chloride	Egr-1; VEGFR	1.069	1.011	0.945744
164	Physostigmine Salicylate	AChR	1.09	1.072	0.983486
165	Cefdinir	PBPs; MPO	1.129	1.135	1.00531
166	Estradiol valerate	Androgen Receptor	1.149	1.146	0.997389
167	Mirtazapine	5-HT; HT; Sert (Sodium-dependent); Adrenergic Receptor; DA transporter; Dopamine; κ-opioid receptor	1.055	1.205	1.14218
168	Cefpiramide acid	PBPs	1.077	1.159	1.07614
169	Brinzolamide	Carbonic anhydrase II	1.109	1.131	1.01984
170	Imiquimod	TLR7; TLR8	1.049	1.021	0.973308
171	(±)-Bisoprolol hemifumarate	β1-adrenergic receptor	1.135	1.096	0.965639
172	Vagistat	14-α Demethylase	1.032	1.152	1.11628
173	Clemastine fumarate	H1 receptor	1.062	1.193	1.12335
174	Calcium folinate	Thymidylate synthase; VB	1.084	1.1	1.01476
175	Bosutinib	Abl; c-Src	1.062	1.189	1.11959
176	Oxaliplatin	DNA synthesis	1.046	1.152	1.10134
177	Nebivolol hydrochloride	β1-adrenoceptor	1.096	1.116	1.01825
178	Rocuronium bromide	mAChR	1.034	1.06	1.02515
179	Roxatidine Acetate hydrochloride	H2 receptor	1.017	1.055	1.03736
180	Anagrelide	PDE	1.063	1.092	1.02728
181	Pantoprazole Sodium Hydrate	Potassium-transporting ATPase; Proton pump	1.107	1.03	0.930443
182	Argatroban	Thrombin	1.176	1.126	0.957483
183	Urapidil	5-HT; α1-adrenergic receptor	1.076	1.095	1.01766
184	Pancuronium bromide	AChR; mAChR	1.034	1.063	1.02805
185	Depofemin	ER	1.048	1.097	1.04676
186	Nefiracetam	GABAR	1.051	1.173	1.11608
187	Maprotiline hydrochloride	5-HT; mAChR; Adrenergic Receptor; H1 receptor; Noradrenaline transporter (Sodium-dependent)	1.028	1.102	1.07198
188	Nylidrin hydrochloride	β-adrenergic receptor	0.9571	1.022	1.06781
189	Amiloride hydrochloride	uPA	1.039	1.112	1.07026
190	Homatropine Bromide	mAChR (SHR-E); mAChR (WKY-E)	1.046	1.018	0.973231
191	Ticagrelor	Midazolam 4-hydroxylation; P2Y12; CYP2C9	1.11	1.19	1.07207
192	Benazepril hydrochloride	ACE	1.044	1.077	1.03161
193	Docetaxel trihydrate	Bcl-2; Tubulin β-1 chain	0.1545	0.4618	2.989
194	Fluticasone propionate	ER; Mineralocorticoid Receptor; Glucocorticoid Receptor; Cytosolic PLA2	0.7949	0.7723	0.971569
195	Pemetrexed acid	DHFR; GARFT; Thymidylate synthase	0.3042	0.8304	2.72978
196	Fenoprofen calcium dihydrate	COX-1; COX-2	1.086	1.004	0.924494
197	Chloroquine diphosphate	Autophagy; TLR7; TLR9	1.093	1.114	1.01921
198	Terazosin hydrochloride	α-adrenergic receptor	1.071	1.12	1.04575
199	Thioctic acid	Multivitamin uptake inhibitor	0.989	1.078	1.08999
200	Protriptyline hydrochloride	Sert (Sodium-dependent)	1.044	0.9505	0.910441
201	Brompheniramine hydrogen maleate	HT	1.093	1.038	0.94968
202	Tamsulosin hydrochloride	α1A-adrenergic receptor; α1B-adrenergic receptor; α1D-adrenergic receptor	0.9842	1.009	1.0252
203	Sumatriptan succinate	5-HT	0.9968	1.079	1.08246
204	Seratrodast	COX; TXA2R	0.9861	1.042	1.05669
205	Thalidomide	TNF-α	1.009	1.026	1.01685
206	Pioglitazone	PPAR	0.977	0.9669	0.989662
207	Losartan potassium	AT1 receptor	1.025	1.067	1.04098
208	Eletriptan HBr	5-HT1B; 5-HT1D	0.9463	1.073	1.13389
209	Levodropropizine	HT	1.025	1.035	1.00976
210	Valdecoxib	COX-2	0.9798	1.028	1.04919
211	Foscarnet sodium	Reverse Transcriptase; Reverse Transcriptase	1.003	1.06	1.05683
212	Thioproline	Annexin A5	1.026	1.1	1.07212
213	Pizotifen Malate	5-HT	0.9784	1.053	1.07625
214	Betaxolol hydrochloride	β1-adrenergic receptor	1.053	1.037	0.984805
215	Methyl hesperidin	Akt; PKC	0.9978	1.043	1.0453
216	Rivastigmine	AChE	0.9855	1.016	1.03095
217	Modaline sulfate	MAO	1.028	1.067	1.03794
218	Tilorone dihydrochloride	interferon inducer	1.005	1.032	1.02687
219	Orciprenaline sulfate	β-adrenergic receptor	0.8558	0.9132	1.06707
220	Acarbose	α-glucosidase	1.033	0.9978	0.965924
221	Clorprenaline hydrochloride	β-adrenergic receptor	0.941	0.9595	1.01966
222	Ciprofloxacin hydrochloride	DNA gyrase; Topo II; Topo IV	0.8936	1.006	1.12578
223	Gemcitabine	Autophagy; DNA synthesis	0.09564	0.6779	7.08804
224	Methscopolamine	mAChR	0.9148	0.9983	1.09128
225	Probucol	ABCA1; CES1	0.9494	0.9717	1.02349
226	Clomipramine hydrochloride	5-HT; Sert (Sodium-dependent); GSTP; Noradrenaline transporter (Sodium-dependent)	0.9455	0.9923	1.0495
227	Lithium citrate tribasic tetrahydrate	IMPDH; mGluR3; GSK-3β	0.981	0.9076	0.925178
228	Zomepirac Sodium	PDE2	0.8841	0.9669	1.09365
229	Quinidine hydrochloride	Potassium Channel; Sodium Channel	0.9192	0.9689	1.05407
230	Zonisamide	Calcium Channel; Carbonic anhydrase; Sodium Channel	0.9348	0.9277	0.992405
231	Lobeline hydrochloride	nAChR; Nicotinic Receptor	0.9881	1.017	1.02925
232	Meclofenamate Sodium	COX-1; COX-2	0.9109	0.9575	1.05116
233	Dichlorisone Acetate	AChE	0.8093	0.7313	0.90362
234	Nilutamide	Androgen Receptor	0.8655	0.9982	1.15332
235	Cinoxacin	Topo II	0.902	0.9722	1.07783
236	Meticrane	Chloride Channel; Sodium Channel	0.9243	0.9031	0.977064
237	Metaraminol bitartrate	α-adrenergic receptor	0.905	0.8768	0.96884
238	Hydrocortisone butyrate	Annexin A1; Glucocorticoid Receptor	0.8249	0.7858	0.9526
239	Isoxicam	COX	0.8942	0.9609	1.07459
240	Hexamethonium Bromide	mAChR; Dopamine	0.8951	0.8842	0.987823
241	Procodazole	Antibacterial	1.039	1.066	1.02599
242	Aminacrine	Others	1.043	1.01	0.96836
243	Tizanidine hydrochloride	α2 adrenergic receptor	0.9914	1.016	1.02481
244	Flurbiprofen	COX; MRP	1.099	1.039	0.945405
245	Clofarabine	RR	0.1514	0.4708	3.10964
246	Dimenhydrinate	H1 receptor	1.099	1.047	0.952684
247	Methylthiouracil	antithyroid	1.083	1.004	0.927054
248	Hexylresorcinol	diphenolase; monophenolase	1.066	0.9956	0.933959
249	Ataractan	5-HT	1.153	1.045	0.906331
250	Colchicine	microtubule	0.3046	0.604	1.98293
251	Indoprofen	COX	0.9949	1.084	1.08956
252	Isoxsuprine hydrochloride	β-adrenergic receptor	0.9831	0.9959	1.01302
253	Buflomedil hydrochloride	α-adrenergic receptor	0.9746	0.9418	0.966345
254	DL-Glutamine	Amino Acids and Derivatives	1.014	0.9593	0.946055
255	Diphenhydramine hydrochloride	H1 receptor	0.9951	1.013	1.01799
256	Moxifloxacin hydrochloride	Topo II; Topo IV	1.019	1.027	1.00785
257	Aniracetam	5-HT; Dopamine; AMPA; GluR	1.082	1.005	0.928835
258	Rosiglitazone	PPAR	0.9977	0.9479	0.950085
259	Sodium salicylate	COX-1; COX-3; NF-κB	1.004	1.02	1.01594
260	Prednisolone-21-acetate	Glucocorticoid Receptor	1.002	0.8486	0.846906
261	Carvedilol phosphate	Adrenergic Receptor; Gap Junction Protein; E-selectin; NADPH dehydrogenase; Natriuretic peptides B; VCAM1; Potassium Channel; VEGFR	1.147	0.976	0.850915
262	Estropipate	ER	1.109	1.082	0.975654
263	Miconazole	14-α Demethylase; eNOS; iNOS; Potassium Channel	1.12	1.037	0.925893
264	Minaprine dihydrochloride	5-HT; Sert (Sodium-dependent); AChE; mAChR; Dopamine; MAO-A	1.144	1.011	0.883741
265	Labetalol hydrochloride	α1-adrenergic receptor	1.043	1.077	1.0326
266	Risperidal	5-HT2A; α2C-adrenergic receptor; D2; D2L; D3	1.172	1.096	0.935154
267	Osalmid	RR	1.113	1.18	1.0602
268	Isovaleramide	Alcohol DHO	1.151	1.122	0.974805
269	Cefadroxil	PBPs	1.134	1.036	0.91358
270	Sildenafil citrate	PDE5; PDE6	1.121	0.9944	0.887065
271	Xylocaine	H1 receptor	1.087	1.1	1.01196
272	Venlafaxine hydrochloride	5-HT	1.143	0.9952	0.870691
273	Crystal Violet	DNA	0.714	0.901	1.2619
274	Sertraline hydrochloride	5-HT	1.183	0.9896	0.836517
275	Sotalol hydrochloride	β-adrenergic receptor; Potassium Channel	1.139	1.023	0.898156
276	Deracoxib	COX-2	1.163	1.07	0.920034
277	Irinotecan hydrochloride trihydrate	Topo I	1.107	1.054	0.952123
278	Metoprolol tartrate	β-adrenergic receptor	1.179	1.073	0.910093
279	Finasteride	5-α reductase	1.12	1.141	1.01875
280	Timolol Maleate	β1-adrenergic receptor; β2-adrenergic receptor	1.131	0.9965	0.881079
281	Flutamide	Androgen Receptor	1.143	1.031	0.902012
282	Abbolactone	Androgen Receptor	1.15	1.047	0.910435
283	Zileuton	COX-1; 5-Lipoxygenase	1.121	1.097	0.978591
284	Progesterone	ER; κ-opioid receptor	1.162	1.095	0.942341
285	Cytisine	nAChR	1.177	1.176	0.99915
286	Doxofylline	PDE	1.204	1.131	0.939369
287	Chlorpropamide	ABCC8	1.24	1.213	0.978226
288	Dimethyl fumarate	KEAP1-Nrf2	1.206	1.121	0.929519
289	Tyrosine	Amino Acids and Derivatives	1.211	1.228	1.01404
290	Tetramisole hydrochloride	SDH	1.196	1.053	0.880435
291	Sasapyrine	COX-1; COX-2	1.146	1.033	0.901396
292	Clotrimazole	14-α Demethylase	1.168	1.057	0.904966
293	4-Aminobutyric acid	GABA	1.17	1.08	0.923077
294	Sulfaguanidine	DHPS	1.135	1.063	0.936564
295	Tioxolone	Carbonic anhydrase I	1.168	1.128	0.965753
296	Lenvatinib	FGFR1; PDGFRβ; VEGFR1/FLT1; VEGFR2/KDR; VEGFR3/FLT4	1.171	0.9932	0.848164
297	Diammonium Glycyrrhizinate	11-beta-hydroxysteroid dehydrogenase	1.202	1.153	0.959235
298	2-NP	STAT1	1.188	1.14	0.959596
299	2,3-Butanedione 2-Monoxime	Akt	1.131	1.094	0.967286
300	Indigo	Others	1.071	1.046	0.976657
301	Methyl Vanillate	Wnt	1.179	1.051	0.891433
302	Dihydrothymine	Nucleoside Analogue	1.189	1.121	0.942809
303	7-Methylxanthine	Nucleoside Antimetabolite/Analog	1.238	1.113	0.899031
304	2-Amino-5-chlorobenzoic acid	Others	1.164	1.032	0.886598
305	Myricetin	PI3Kγ	1.229	1.169	0.95118
306	Oleanolic Acid	Antibiotic	1.228	1.15	0.936482
307	Cinnamic acid	Antibacterial	1.229	1.216	0.989422
308	Glycyrrhizin	Dehydrogenase	1.297	1.206	0.929838
309	DL-Menthol	Others	1.216	1.172	0.963816
310	4-Hydroxyantipyrine	COX-1; COX-2	1.139	1.084	0.951712
311	Sulfanilamide	DHPS	1.187	1.053	0.88711
312	Chloropyramine hydrochloride	FAK-VEGFR-3; H1 receptor	1.147	1.089	0.949433
313	Scopolamine N-oxide HBr	mAChR; Sucrase-isomaltase	1.19	1.066	0.895798
314	Paeoniflorin	COX	1.204	1.085	0.901163
315	Bengenin	IL-1β; IL-6; NF-κB; NOD; TNF-α	1.218	1.234	1.01314
316	17-Beta-Estradiol-3,17-Dipropionate	ER	1.243	1.183	0.95173
317	Losartan	AT1 receptor	1.272	1.062	0.834906
318	Dasatinib monohydrate	Abl; c-Kit (D816V); c-Kit (wt); EphA2; Src	0.77	0.4895	0.635714
319	Cyproheptadine hydrochloride	5-HT2; SETD7; SETD9	1.233	1.166	0.945661
320	Cloperastine hydrochloride	HT	1.146	1.004	0.876091
321	Cytidine	Nucleoside Analogue	0.9155	1.092	1.19279
322	DL-Adrenaline Hydrochloride	Adrenergic Receptor	0.9791	1.047	1.06935
323	2-Aminobenzenesulfonamide	DHPS	1.006	1.055	1.04871
324	Methiothepin mesylate	5-HT; Dopamine	0.9814	1.14	1.16161
325	Tacrine hydrochloride hydrate	AChR	1.104	1.228	1.11232
326	Ferulic Acid	FGFR1	1.029	1.25	1.21477
327	Palmitic acid	Endogenous Metabolite	1.025	1.269	1.23805
328	Paeonol	MAO-A; MAO-B	1.067	1.209	1.13308
329	Daidzein	PPAR	1.011	1.178	1.16518
330	Naringin	CYP450	0.9599	1.148	1.19596
331	Sennoside A	MAO	1.025	1.009	0.98439
332	Isoniazid	CAT; NAPDH	1.012	1.035	1.02273
333	Pyridoxine	PLK	1.119	1.131	1.01072
334	Floxuridine	Thymidylate synthase	0.1967	0.798	4.05694
335	Yohimbine hydrochloride	α2 adrenergic receptor	1.084	1.217	1.12269
336	Dorzolamide hydrochloride	Carbonic anhydrase I; Carbonic anhydrase II; Carbonic anhydrase IV	1.081	1.208	1.11748
337	Ethisterone	ER	1.134	1.204	1.06173
338	Novobiocin Sodium	ABCG2; DNA gyrase; Bile salt export pump; Topo I	1.103	1.181	1.07072
339	Triprolidine hydrochloride	H1 receptor	1.067	1.177	1.10309
340	Dequalinium chloride	PKC	0.8039	1.003	1.24767
341	Nifenazone	COX	1.001	1.023	1.02198
342	Noscapine hydrochloride	Opioid alkaloid	1.044	1.035	0.991379
343	d-penicillamin	Copper	1.101	1.164	1.05722
344	Fluorouracil	Thymidylate synthase	0.9811	1.096	1.11711
345	Aztreonam	PBPs; β-Lactamase	1.104	1.27	1.15036
346	Desipramine hydrochloride	5-HT; Adrenergic Receptor	1.111	0.9952	0.89577
347	Methoxamine hydrochloride	Adrenergic Receptor	1.077	1.185	1.10028
348	Ketotifen fumarate	H1 receptor; PDE	1.103	1.17	1.06074
349	Erythromycin	23S rRNA; 50S ribosome	1.023	1.136	1.11046
350	Granisetron hydrochloride	5-HT	0.9621	1.053	1.09448
351	Loxeen	mAChR	1.073	1.044	0.972973
352	Gimeracil	DHPS	1.101	1.1	0.999092
353	Temephos	AChR	1.031	1.18	1.14452
354	Propantheline bromide	mAChR	1.009	1.228	1.21705
355	Cephalexin	PBPs	1.142	1.214	1.06305
356	Clevidipine butyrate	AChR; Calcium Channel	1.133	1.215	1.07237
357	Chlorhexidine	HNMT; CAT	1.081	1.167	1.07956
358	Aquacrine	ER	1.098	1.225	1.11566
359	Acebutolol hydrochloride	β-adrenergic receptor	0.9363	1.093	1.16736
360	Prednisone	Glucocorticoid Receptor; MRP1	0.9372	0.9764	1.04183
361	Itraconazole	CYP3A4	0.9885	1.035	1.04704
362	Doxorubicin hydrochloride	Topo II	0.2189	0.7406	3.38328
363	Tranylcypromine (2-PCPA) hydrochloride	MAO	1.044	1.124	1.07663
364	Mafenide hydrochloride	Carbonic anhydrase VI	1.138	1.031	0.905975
365	Metronidazole	14-α Demethylase; Fe hydrogenase 1; NADPH nitroreductase	1.088	1.084	0.996324
366	Dexamethasone	Glucocorticoid Receptor; IL receptor	0.8639	0.8591	0.994444
367	Docetaxel	microtubule	0.1176	0.5079	4.31888
368	Hesperidin	Autophagy	1.028	1.147	1.11576
369	Choline chloride	mAChR	1.015	1.056	1.04039
370	Trimipramine maleate	5-HT; Sert (Sodium-dependent); Adrenergic Receptor; DA transporter; Dopamine; H1 receptor; Noradrenaline transporter (Sodium-dependent)	0.9748	1.026	1.05252
371	Estradiol	ER	1.094	1.1	1.00548
372	Oxybutynin hydrochloride	mAChR	0.9975	1.096	1.09875
373	Prazosin hydrochloride	ABCG; Adrenergic Receptor; MRP1; Potassium Channel	0.984	1.095	1.1128
374	Fluvoxamine maleate	5-HT	1.119	1.085	0.969616
375	Tretinoin	RAR	0.6135	0.8697	1.4176
376	Ifosfamide	DNA/RNA Synthesis	1.103	1.152	1.04442
377	Isoprenaline hydrochloride	Adrenergic Receptor; cAMP PDE; PI3K	0.8592	1.145	1.33264
378	Azilsartan	AT1 receptor	1.086	1.172	1.07919
379	Carboplatin	DNA synthesis	1.03	1.126	1.0932
380	Formestane	Aromatase	0.959	1.083	1.1293
381	Flumequine	Topo II	1.083	1.003	0.926131
382	Capsaicin	hTRPV1( in HEK293 cell)	1.071	1.122	1.04762
383	Proglumide	CCK	1.071	1.028	0.959851
384	Tolbutamide	Potassium Channel	1.063	1.122	1.0555
385	Metoclopramide hydrochloride	5-HT; mAChR; Dopamine	1.141	1.128	0.988606
386	Etomidate	GABAR	0.9915	1.113	1.12254
387	Dronedarone hydrochloride	Adrenergic Receptor; Calcium Channel; Potassium Channel; Sodium Channel	1.068	1.134	1.0618
388	Noradrenaline bitartrate monohydrate	β1-adrenergic receptor	1.028	1.059	1.03016
389	Baclofen	GABAR	1.01	1.088	1.07723
390	Zolmitriptan	5-HT	1.016	1.068	1.05118
391	Nafronyl oxalate	5-HT	0.983	1.029	1.0468
392	Theophylline	Adenosine receptor; HDAC2; PDE	1.002	1.131	1.12874
393	Apramycin sulfate	16S rRNA	1.064	1.095	1.02914
394	Glutathione	Glutathione reductase	1.167	1.121	0.960583
395	Adapalene	RAR; RXR	0.6814	0.9826	1.44203
396	Tolnaftate	Smoothened	1.098	1.23	1.12022
397	Vitamin D2	DNA polymerase; VD3	1.04	1.13	1.08654
398	Repaglinide	Potassium Channel; PPARγ	1.024	1.129	1.10254
399	Aminoglutethimide	Aromatase	0.9744	1.03	1.05706
400	Perphenazine	CAM; Dopamine	0.862	1.048	1.21578
401	Paromomycin Sulfate	16S rRNA	0.9662	1.024	1.05982
402	Afalanine	Amino Acids and Derivatives	1.041	0.9843	0.945533
403	Meclizine dihydrochloride	H1 receptor	1.014	0.9507	0.937574
404	Sparfloxacin	DNA gyrase; Topo II; Topo IV	1.049	1.005	0.958055
405	Valacyclovir hydrochloride	DNA polymerase	1.076	1.047	0.973048
406	Milrinone	PDE2; PDE3	1.024	1.076	1.05078
407	Mifepristone	PR; Glucocorticoid Receptor	1.082	1.087	1.00462
408	Doxylamine succinate	H1 receptor	1.06	1.041	0.982075
409	Clorgyline hydrochloride	MAO	1.026	0.9934	0.968226
410	Loratadine	B(0)AT2	0.9977	1.001	1.00331
411	Rasagiline	Bcl-2; MAO-A; MAO-B	0.9562	1.053	1.10123
412	Phenyl acetate	Others	0.9949	1.045	1.05036
413	Pralidoxime Chloride	AchE	1.053	1.048	0.995252
414	BMS 599626 2HCl (873837-23-1(HCl))	HER1; HER2; HER4	1.061	0.9333	0.879642
415	Eprodisate disodium	SAA	1.041	1.065	1.02305
416	Arbutin	Tyrosinase	1.101	1.039	0.943688
417	Podophyllotoxin	microtubule; Topo II	0.2789	0.6339	2.27286
418	Cephalothin sodium	PBPs	1.029	1.035	1.00583
419	Cefprozil hydrate	PBPs	0.9838	0.9958	1.0122
420	Nicergoline	Adrenergic Receptor	0.8776	0.9347	1.06506
421	Nimesulide	COX-2	0.9319	0.949	1.01835
422	Oxiracetam	GABAR	1	1.019	1.019
423	Salbutamol	β-adrenergic receptor	0.8618	0.9869	1.14516
424	Clindamycin phosphate	23S rRNA; 50S ribosome	1.006	1.028	1.02187
425	Diminazene Aceturate	Peroxiredoxin-5; QacR; Trypsin-1	1.02	1.046	1.02549
426	Nifedipine	Calcium Channel; CAM; Potassium Channel	0.9766	1.019	1.04342
427	Taurocholic acid sodium salt hydrate	Gastrotropin; Bile salt-activated lipase	0.9807	1.043	1.06353
428	Chlorhexidine hydrochloride	HNMT; CAT; cell wall	0.9649	1.017	1.054
429	Fenofibrate	CYP2B6; CYP2C; CYP2C19; PPARα	1.053	1.086	1.03134
430	Albendazole	microtubule	0.8502	1.027	1.20795
431	Rifaximin	DNA/RNA Synthesis	1.026	0.9498	0.925731
432	Trimethoprim	DHFR; Thymidylate synthase	0.9139	1.042	1.14017
433	Mebendazole	Tubulin α-1A chain; Tubulin β-4B chain	0.7581	0.9083	1.19813
434	Palonosetron hydrochloride	5-HT	1.032	1.035	1.00291
435	Phenoxybenzamine hydrochloride	α-adrenergic receptor; CAM	1.005	1.017	1.01194
436	Leflunomide	AhR; DHODH; Protein-tyrosine kinase 2	0.9546	0.9809	1.02755
437	Anethole trithione	Others	1	0.9703	0.9703
438	Lonidamine	hexokinase	0.9925	0.9905	0.997985
439	Oxiconazole nitrate	14-α Demethylase; LSS	0.9508	1.037	1.09066
440	Cisapride	5-HT; Potassium Channel	0.8965	1.027	1.14557
441	Auranofin	TrxR	0.9047	0.9308	1.02885
442	Norfloxacin	DNA gyrase; Topo II	0.9558	0.9909	1.03672
443	Carmofur	DNA/RNA Synthesis	0.957	1.088	1.13689
444	Orphenadrine hydrochloride	H1 receptor; NMDA receptor; Noradrenaline transporter (Sodium-dependent); Sodium Channel	0.9173	1.01	1.10106
445	Nonivamide	TRPV1	0.9167	0.9732	1.06163
446	Phosphoserine	Amino Acids and Derivatives; NMDA receptor	0.97	0.9622	0.991959
447	Carprofen	COX-2	0.867	0.9148	1.05513
448	Gentamycin sulfate	DNase I; DHFR; 16S ribosome; 30S ribosome	0.939	0.869	0.925453
449	Nortriptyline hydrochloride	5-HT; Sert (Sodium-dependent); mAChR; Adrenergic Receptor; Dopamine; H1 receptor; Noradrenaline transporter (Sodium-dependent)	0.8869	1.036	1.16811
450	DL-trihexyphenidyl hydrochloride	mAChR	0.9286	0.9638	1.03791
451	Disopyramide	mAChR; Potassium Channel; Sodium Channel	0.956	0.9495	0.993201
452	Tolazamide	Potassium Channel	0.8917	0.9582	1.07458
453	Hydroquinidine	Potassium Channel; Sodium Channel	0.9838	0.9867	1.00295
454	5-Azacytidine	DNA methyltransferase (DNMT)	0.8779	1.055	1.20173
455	Nortropine	mAChR	0.9539	0.9744	1.02149
456	2-Benzothiazolamine	IL-8; Others	0.8976	0.9958	1.1094
457	5-Fluorouridine	DNA synthesis; Upp	0.4255	0.837	1.9671
458	N-6-Trifluoroacetyl-L-lysine	Amino Acids and Derivatives	0.9312	0.966	1.03737
459	N-Acetyl-5-hydroxytryptamine	TrkB	0.8878	1.016	1.1444
460	AC-Beta-ALA-OH	Analogue of amino acids	0.8563	0.9576	1.1183
461	2-Picolinyl hydrazide	CAT; NAPDH	0.8786	1.02	1.16094
462	2-Amino-5-methyl-3-thiophenecarbonitrile	COX	0.8114	0.8785	1.0827
463	Methyldienedione	ER	0.8784	0.8666	0.986566
464	Methyl protocatechuate	Antioxidant	0.8865	0.8789	0.991427
465	Allantoin	Endogenous Metabolite; Imidazoline Receptor	0.8599	0.8909	1.03605
466	Epiandrosterone	Androgen Receptor; PR	0.8166	0.814	0.996816
467	Amoxicillin trihydrate	PBPs	0.8174	0.8848	1.08246
468	Nalidixic acid sodium salt	Topo II	0.8674	0.8455	0.974752
469	6-Mercaptopurine monohydrate	DNA synthesis; PRPP Amidotransferase	0.4045	0.5939	1.46823
470	Dipyron	COX-1	0.7617	0.9294	1.22017
471	Promethazine hydrochloride	α-adrenergic receptor; H1 receptor	0.8336	0.9884	1.1857
472	Lithocholic acid	FXR; PXR; VD	0.8297	0.9076	1.09389
473	Theophylline-7-acetic acid	A1; A2; A3; HDAC2; PDE4; PKA; TNF-α	0.8629	0.8154	0.944953
474	Aceglutamide	N-acylamino acid racemase	0.8695	0.8919	1.02576
475	Ethinamide	CAT; NAPDH	0.8453	0.9656	1.14232
476	Olopatadine hydrochloride	HT	0.8893	0.879	0.988418
477	Tropisetron hydrochloride	5-HT	0.831	0.8868	1.06715
478	Topotecan hydrochloride	Topo I (DU-145 Luc cells); Topo I (MCF-7 Luc cells)	0.08367	0.245	2.92817
479	Cyproterone acetate	Androgen Receptor	0.8551	0.9135	1.0683
480	Temozolomide	DNA replication	0.8131	0.9054	1.11352
481	Tiotropium bromide	mAChR	1.127	1.004	0.890861
482	Blonanserin	5-HT2; D2	1.094	1.029	0.940585
483	Gefitinib	Tyr1173 (NR6W cells); Tyr1173 (NR6wtEGFR cells); Tyr992 (NR6W cells); Tyr992 (NR6wtEGFR cells)	0.9688	0.8812	0.909579
484	Propionyl-L-carnitine hydrochloride	H1 receptor	1.042	0.9921	0.952111
485	Rivaroxaban	Factor Xa; Thrombin	0.974	1.049	1.077
486	Rofecoxib	COX-2	0.9985	1.005	1.00651
487	Bifonazole	Others; CYP51	1.08	0.9981	0.924167
488	Mizoribine	monophosphate synthetase	1.099	1.057	0.961783
489	Cefmenoxime hydrochloride	PBPs; Fts1	1.043	1.077	1.0326
490	Analgin	COX-1	0.9803	1.031	1.05172
491	Clomifene citrate	ER	1.021	1.01	0.989226
492	Mitotan	Adrenodoxin	1.075	0.9573	0.890512
493	Nadolol	β-adrenergic receptor	1.061	0.951	0.896324
494	Bendroflumethiazide	Carbonic anhydrase; Potassium Channel	1.012	0.9916	0.979842
495	Amsacrine	Potassium Channel; Topo II	0.2087	0.7099	3.40153
496	Ibandronate sodium	HAP; FPS	1.042	1.013	0.972169
497	Nicardipine hydrochloride	mAChR; Adrenergic Receptor; Calcium Channel	1.006	0.9827	0.976839
498	Diethylstilbestrol	ER	0.9751	0.9582	0.982668
499	Aminopar	COX-2; ALOX5; MPO; NF-κB	0.9919	0.9949	1.00302
500	Flunixin meglumin	COX-1; COX-2	1.02	1.058	1.03725
501	Sodium etidronate	protein tyrosine phosphatase	1.058	1.064	1.00567
502	Ketorolac tromethamine salt	COX-1; COX-2	1.014	1.119	1.10355
503	Cefonicid sodium	PBPs	1.105	1.071	0.969231
504	Erdosteine	Adenosine deaminase	1.034	1.029	0.995164
505	Pilocarpine nitrate	mAChR	1.038	1.014	0.976879
506	Pyrilamine maleate	H1 receptor	1.047	1.047	1
507	Oxolinic acid	bacterial DNA gyrase; DNA synthesis; dopamine uptake	0.9855	1.004	1.01877
508	Ceftriaxone sodium	Others	1.023	1.121	1.0958
509	Indacaterol maleate	β1-adrenoceptor; β2-adrenoceptor	0.963	1	1.03842
510	Altretamine	DNA Alkylating	1.011	1.103	1.091
511	Azathioprine	HGPRT; Rac1	0.8819	0.9139	1.03629
512	Sulfanitran	DHPS	1.026	1.029	1.00292
513	Triethylenethiophosphoramide	DNA Alkylation	0.8301	1.005	1.2107
514	Clonidine hydrochloride	α2 adrenergic receptor	1.033	1.06	1.02614
515	Nabumetone	COX-1; COX-2; MPO	1.036	1.013	0.977799
516	Sodium cromoglycate	Protein S100-P; Potassium Channel	1.033	1.03	0.997096
517	Ciprofibrate	PPAR	1.107	1.079	0.974706
518	Ubenimex	LTA(4)H-h; APN	1.077	1.055	0.979573
519	Tripelennamine hydrochloride	H1 receptor	1.031	1.056	1.02425
520	Vincristine sulfate	microtubule	0.3172	0.6786	2.13934
521	Cytarabine	DNA synthesis	0.1202	0.825	6.86356
522	Diacerein	IL-1β	1.101	1.046	0.950045
523	Benzbromarone	CYP2C9	1.037	1.104	1.06461
524	Astemizole	H1 receptor; Potassium Channel	1.134	1.043	0.919753
525	Vilazodone HCl	5-HT1A; SSRI	1.096	1.057	0.964416
526	Tropicamide	M4 mAChR	1.033	1.027	0.994192
527	Carteolol hydrochloride	β-adrenergic receptor	1.069	1.047	0.97942
528	Vindoline	Microtubule	1.061	1.102	1.03864
529	Tanshinone I	PLA2	1.014	1.059	1.04438
530	4'-Demethylepipodophyllotoxin	Topo II	0.402	0.9043	2.2495
531	Myricetrin	PKCα; PKCε	1.063	1.084	1.01976
532	Naringin dihydrochalcone	CYP	1.039	1.064	1.02406
533	Polydatin	PLA2	1.139	1.013	0.889377
534	Catharanthine	nAChR	1.064	1.179	1.10808
535	Sinomenine hydrochloride	NF-κB	1.083	1.045	0.964912
536	10-Hydroxycamptothecin	Topo I	0.08381	0.304	3.62725
537	Biochanin A	EGFR; FAAH (human); FAAH (mouse); FAAH (rat)	1.12	1.146	1.02321
538	Flavone	NOS	1.119	1.221	1.09115
539	Arecoline HBr	mAChR	1.044	1.127	1.0795
540	Baccatin III	Others	0.968	1.005	1.03822
541	(S)-(+)-Camptothecin	Topo I	0.08821	0.3596	4.07664
542	S-allyl-L-cysteine	Others	1.181	1.064	0.900931
543	Rotenone	NAPDH; p53	0.4998	0.8505	1.70168
544	Glycocholic acid	Others	1.163	1.092	0.938951
545	Tolterodine tartrate	mAChR	1.189	1.15	0.967199
546	Deoxycholic acid	Endogenous Metabolite; GPCR19	1.12	1.124	1.00357
547	Alizarin	CYP1A1; CYP1A2; CYP1B1	1.222	1.236	1.01146
548	Usnic Acid	Autophagy	1.149	1.06	0.922541
549	Asarylaldehyde	COX-2	1.219	1.179	0.967186
550	2-Methoxynaphthoquinone	Apoptosis	1.037	1.056	1.01832
551	Mangiferin	Nrf2;p50;p65	1.125	1.036	0.920889
552	Olaparib	PARP1; PARP2	1.048	1.073	1.02385
553	Buspirone hydrochloride	5-HT; Dopamine	1.156	1.039	0.898789
554	Trenbolone acetate	Androgen Receptor	1.21	1.148	0.94876
555	Geniposidic Acid	Others	1.148	1.171	1.02003
556	Hederagenin	Others	1.187	1.17	0.985678
557	Vinpocetine	NF-κB; PDE; Sodium Channel	1.188	1.16	0.976431
558	Norgestrel	ER	1.21	1.197	0.989256
559	Ruxolitinib (INCB-18424) phosphate	JAK1; JAK2	1.021	1.164	1.14006
560	Tryptamine	5-HT; AADH; hTRPA1	1.009	1.123	1.11298
561	Dihydroartemisinin	Autophagy; NF-κB	1.099	0.9873	0.898362
562	Piceatannol	cAK; PKC; MLCK	1.134	0.9861	0.869577
563	2-Methoxyphenothiazine	Factor Xa	1.111	1.03	0.927093
564	beta-Alanine	GABAR	1.24	1.09	0.879032
565	Nicotinamide-N-oxide	c-Myc	1.16	1.165	1.00431
566	Indole-3-Glyoxylyl Chloride	Lysozyme	1.244	1.104	0.88746
567	2-Bromo-6-methoxynaphthalene	Sert (Sodium-dependent)	1.176	1.198	1.01871
568	N-Phenylbenzylamine	Tubulin polymerization	1.162	1.229	1.05766
569	Sulfapyridine	DHPS	1.149	1.231	1.07137
570	Mesalamine	COX; ALOX5; MPO; NF-κB; PPARγ	0.9896	1.135	1.14693
571	Hesperetin	HT; TGFβ	1.107	1.008	0.910569
572	Drofenine hydrochloride	AChE	1.132	1.167	1.03092
573	Ursolic acid	Autophagy	1.166	1.109	0.951115
574	Luteolin	PDE1; PDE2; PDE3; PDE4; PDE5	1.198	1.134	0.946578
575	Formononetin	FGFR	1.182	1.123	0.950085
576	Isoliquiritigenin	Aldose reductase	1.209	1.256	1.03888
577	Fulvestrant	ER	1.204	1.182	0.981728
578	Oxfendazole	Glucose uptake inhibitor; Tubulin chain	1.175	1.222	1.04
579	Molindone hydrochloride	5-HT; mAChR; Dopamine	1.111	1.142	1.0279
580	Enoxacin Sesquihydrate	DNA gyrase; Topo II; Topo IV	1.006	1.122	1.11531
581	Brivudine	HSV-1; VZV	1.05	1.042	0.992381
582	Gallamine triethiodide	AChR	1.042	1.049	1.00672
583	Bergapten	CYP	1.061	1.134	1.0688
584	Triflusal	PDE; TXA2R	1.219	1.065	0.873667
585	Lisinopril dihydrate	MRP1; ACE	1.207	1.142	0.946147
586	Cyclophosphamide monohydrate	DNA; MRP1	1.097	1.267	1.15497
587	Oxaprozin	COX	1.107	1.262	1.14002
588	Pimaricin	ER	1.146	1.268	1.10646
589	L-Cycloserine	GABA	1.113	1.097	0.985624
590	Niclosamide	STAT3	0.9608	0.995	1.0356
591	Suloctidil	Antiplatelet-aggregation	1.08	1.004	0.92963
592	Naftopidil	α1A-adrenergic receptor; α1B-adrenergic receptor; α1D-adrenergic receptor	1.127	1.015	0.900621
593	Ursodeoxycholic acid	Bile salt export pump	1.115	1.182	1.06009
594	Gabapentin	GABAR	1.112	1.134	1.01978
595	Flavoxate hydrochloride	mAChR	1.192	1.213	1.01762
596	Cyanoacetohydrazide	GSK-3	1.225	1.18	0.963265
597	Simvastatin	HMG-CoA reductase	1.138	1.207	1.06063
598	Ganciclovir	FHV-1	1.105	1.205	1.0905
599	Quinine	Fe(II)-protoporphyrin IX; Platelet glycoprotein IX; Potassium Channel	1.091	1.161	1.06416
600	Niflumic acid	COX; Monocarboxylate transporter; Chloride channel protein ClC-Ka; PLA2; UGT	1.018	1.08	1.0609
601	Pranlukast	IL-5; CysLTR; NF-κB; Eosinophil cationic protein; Mucin-2; TNF-α	1.105	1.027	0.929412
602	Amitriptyline hydrochloride	5-HT; 5-HT2; 5-HT4; Norepinephrine receptor; σ1	1.128	1.096	0.971631
603	Ketoconazole	12-hydroxylase; 17-hydroxylase; Steroid 21-hydroxylase; Testosterone 6 beta-hydroxylase; Cyclosporine oxidase; CYP24A1; CYP3A4	1.125	1.056	0.938667
604	Lamotrigine	5-HT (human platelets); 5-HT (rat brain synaptosomes)	1.128	1.056	0.93617
605	Rifampicin	14-α Demethylase; DNA/RNA Synthesis	1.16	1.146	0.987931
606	Lamivudine	Reverse Transcriptase	1.207	1.087	0.90058
607	Mevastatin	HMG-CoA reductase; CES1	1.189	1.118	0.940286
608	Ribavirin	ADK; IMPDH1; RNA polymerase	1.212	1.201	0.990924
609	Stugeron	Calcium Channel; H1 receptor	1.097	1.152	1.05014
610	L-arginine monohydrochloride	Amino Acids and Derivatives	1.029	1.187	1.15355
611	Pravastatin sodium	HMG-CoA reductase	1.149	1.02	0.887728
612	Hydroxyurea	ribonucleoside diphosphate reductase	1.134	0.9597	0.846296
613	Chlorothiazide	Carbonic anhydrase	1.167	1.012	0.867181
614	Mestinon	AChE	1.225	1.046	0.853878
615	Coumarin	Factor Xa; VK	1.142	1.175	1.0289
616	Febuxostat	XO	1.151	1.121	0.973936
617	Troxerutin	NOD-like Receptor (NLR)	1.11	1.175	1.05856
618	Cholesterol	MRP1; RORα	1.148	1.12	0.97561
619	Monobenzone	Tyrosinase	1.149	1.145	0.996519
620	Piroxicam	COX	0.9521	1.016	1.06711
621	Omeprazole	Autophagy; Proton pump	1.092	0.9813	0.898626
622	Carbaglu	Carbamoyl-phosphate synthase	1.08	1.015	0.939815
623	Sulfamethizole	DHPS	1.141	1.047	0.917616
624	Salicylanilide	Reverse Transcriptase	1.172	0.9843	0.839846
625	Furazolidone	MAO	1.11	1.102	0.992793
626	Sulfisoxazole	DHPS	1.177	1.066	0.905692
627	Succinylsulfathiazole	DHPS; DHPS	1.124	1.187	1.05605
628	Sulfameter	DHFR	1.167	1.079	0.924593
629	Sulfathiazole	DHPS; DHPS	1.039	1.082	1.04139
630	Orotic acid	DHOase	1.002	1.061	1.05888
631	Benzydamine hydrochloride	COX	1.089	0.9995	0.917815
632	Antipyrine	COX	1.072	1.004	0.936567
633	L-Ornithine	Ornithine aminotransferase; Ornithine carbamoyltransferase; Arginase-1; Arginase-2; Ornithine decarboxylase antizyme 1	1.122	1.007	0.897504
634	Urea	Arginase-1; Carbonic anhydrase II; DHFR; Sulfoxide reductase catalytic subunit YedY; Wnt/β-catenin	1.154	1.099	0.95234
635	Metformin hydrochloride	AMPK	1.135	1.075	0.947137
636	Acetylcysteine	ROS; TNF-α	1.107	1.062	0.95935
637	Clioquinol	Antibiotic	1.071	1.091	1.01867
638	Diosmin	Norepinephrine (NE)	1.056	1.077	1.01989
639	6-Aminocaproic acid	Plasminogen	1.053	1.019	0.967711
640	D-Camphor	TRPV3	1.026	1.138	1.10916
641	Homotaurine	Aβ; GABA	1.139	0.9371	0.822739
642	n-Docosanol	GP340; GP350	1.094	1.015	0.927788
643	Sulfamethoxazole	DHPS; FolC	1.088	1.002	0.920956
644	4-Biphenylacetic acid	COX	1.099	0.9874	0.898453
645	Mefenamic acid	COX-1; COX-2	1.099	1.082	0.984531
646	Diprophylline	PDE	1.101	1.055	0.95822
647	Furacilin	Malate dehydrogenase; Pyruvate dehydrogenase; Glutathione reductase	1.049	1.137	1.08389
648	Ofloxacin	Topo	1.056	1.08	1.02273
649	Topiramate	Carbonic anhydrase; GABAR; mGluR5	1.049	1.065	1.01525
650	Betahistine mesylate	H1 receptor; H3 receptor	1.003	1.089	1.08574
651	Adrenosterone	Androgen Receptor	1.16	1.07	0.922414
652	Serotonin hydrochloride	5-HT	1.065	0.9796	0.919812
653	Cepharanthine	TNF-α	1.007	0.9986	0.991658
654	Adenosine 5'-monophosphate monohydrate	AMPK	1.09	1.063	0.975229
655	L-5-Hydroxytryptophan	Amino Acids and Derivatives	1	1.052	1.052
656	Promazine hydrochloride	5-HT; mAChR; Adrenergic Receptor; Dopamine	1.021	1.062	1.04016
657	Terconazole	14-α Demethylase	1.018	1.036	1.01768
658	Phenacetin	COX-1	1	1.026	1.026
659	Salicylic acid	COX	0.9992	1.081	1.08187
660	Batyl alcohol	Others	0.988	1.047	1.05972
661	Esculetin	Lipoxygenase	1.049	1.01	0.962822
662	Phloretin	SGLT1; SGLT2	1.115	0.9904	0.888251
663	3,3'-Diindolylmethane	Androgen Receptor	1.159	0.9382	0.809491
664	Phenibut	GABAR	1.086	1.028	0.946593
665	Dihydromyricetin	GABAR	1.028	1.045	1.01654
666	Rheic Acid	Autophagy	1.067	1.057	0.990628
667	Honokiol	P-Akt; MEK	0.9949	1.067	1.07247
668	Magnolol	NF-κB; p53; PPARγ	1.018	1.052	1.0334
669	Piperine	P-gp (P-glycoprotein)	1.066	1.07	1.00375
670	Curcumin	p300 histone acetylatransferase; KEAP1-Nrf2	1.028	1.066	1.03696
671	Cordycepin	TNF-α	1.073	0.9627	0.897204
672	Pinocembrin	NF-κB	1.026	0.9641	0.939669
673	Chrysophanic Acid	EGFR	1.086	1.029	0.947514
674	Cardamonin	hTRPA1 cation channel	1.059	1.049	0.990557
675	Tetrandrine	Calcium Channel	0.9734	0.9735	1.0001
676	Norcantharidin	c-Met;EGFR	0.9949	0.9879	0.992964
677	Rotundine	5-HT1A; D1; D2; D3	1.108	1.073	0.968412
678	Fisetin	SIRT	1.083	0.9801	0.904986
679	Hyodeoxycholic acid	FXR	0.9943	1.022	1.02786
680	Lycorine chloride	HCV	0.9655	0.9664	1.00093
681	Naringenin	CYP1A2	1.015	0.9834	0.968867
682	Baicalin	GABAR	1.025	1.04	1.01463
683	Scoparone	Others	1.032	0.9758	0.945543
684	Trigonelline hydrochloride	Others	0.9869	0.9535	0.966157
685	Andrographolide	NF-κB	1.023	0.9282	0.907331
686	Osthole	H1 receptor	1.002	0.976	0.974052
687	Rutaecarpine	COX-2	1.005	1.029	1.02388
688	Asiatic acid	p38 MAPK	0.9405	1.014	1.07815
689	Scutellarin	Akt; STAT	1.009	0.9766	0.967889
690	Limonin	HIV Protease	0.96	0.9675	1.00781
691	Caffeic Acid	5-Lipoxygenase; Endogenous Metabolite; hTRPA1	1.001	0.9584	0.957443
692	Sodium Danshensu	CYP450	0.9492	0.9706	1.02255
693	Betulinic acid	Aminopeptidase N; HIV-1; Eukaryotic topoisomerase I	1.022	0.9528	0.93229
694	Isoalantolactone	Apoptosis	0.9404	0.9521	1.01244
695	Evodiamine	PGE	0.8864	0.955	1.07739
696	Tanshinone IIA	VEGFR2	0.9221	0.8675	0.940787
697	Imperatorin	BChE; NO synthesis; TRPV1	0.9767	0.9251	0.947169
698	Oxymatrine	Autophagy	1.004	0.9527	0.948904
699	Emodin	CK2	1.01	0.9542	0.944752
700	Baicalein	XO	0.9744	0.9994	1.02566
701	(+)-Matrine	κ-opioid receptor	0.9533	0.9394	0.985419
702	Pterostilbene	Autophagy	0.9532	0.819	0.859211
703	Cryptotanshinone	STAT3	0.9057	0.7802	0.861433
704	Sulfasalazine	COX-1; COX-2; NF-κB	0.8454	0.8647	1.02283
705	Nalidixic acid	Topo II	0.9187	0.8846	0.962882
706	Cefotaxime sodium	PBPs	0.888	0.8972	1.01036
707	Sulfamerazine	DHPS	0.8802	0.8816	1.00159
708	Benfluorex hydrochloride	Others	0.8536	0.8149	0.954663
709	Ambroxol	CYP3A	0.9753	0.8945	0.917154
710	Sulfabenzamide	Antibacterial	0.9082	0.915	1.00749
711	Busulfan	DNA Alkylation	0.9271	0.9585	1.03387
712	Benzocaine	MRP1; LCE 1; Sodium Channel	0.8778	0.8065	0.918774
713	PMSF	Cysteine protease; Serine Protease	0.9434	0.8632	0.914988
714	Carbaryl	AChR	0.8594	0.9106	1.05958
715	Reserpine	MRP1; SVAT; Bile salt export pump	0.9047	0.8742	0.966287
716	(-)-Sparteine sulfate pentahydrate	Sodium Channel	0.9137	0.8697	0.951844
717	Mepenzolate Bromide	mAChR	0.8929	0.8862	0.992496
718	Benzthiazide	Carbonic anhydrase	0.9332	1.185	1.26982
719	Tolfenamic Acid	COX-2	0.9391	0.9295	0.989777
720	Dexchlorpheniramine Maleate	Sert (Sodium-dependent); DA transporter; H1 receptor; Noradrenaline transporter (Sodium-dependent)	0.8503	0.9179	1.0795
721	Clidinium bromide	mAChR	1.124	0.9581	0.852402
722	Rutin	AKR	1.07	0.9221	0.861776
723	Antrapurol	AMPK	1.059	0.8782	0.829273
724	Tannic acid	CXCR	1.028	0.8567	0.833366
725	(+)-Pilocarpine hydrochloride	mAChR	1.136	0.9334	0.821655
726	Quinapril hydrochloride	ACE	1.087	0.9691	0.891536
727	Cimetidine	H2 receptor	1.073	0.9601	0.894781
728	Triamcinolone	COX; Glucocorticoid Receptor	1.122	0.8448	0.752941
729	Ethambutol dihydrochloride	Antifungal	1.1	0.9508	0.864364
730	Amisulpride	5-HT; Dopamine	1.101	0.9521	0.864759
731	Propranolol hydrochloride	β-adrenergic receptor	1.088	0.8907	0.818658
732	Acetazolamide	Carbonic anhydrase	1.124	0.9164	0.815302
733	Acetohexamide	NADPH; Potassium Channel	1.053	0.8758	0.831719
734	Diflunisal	p300	1.066	0.9266	0.869231
735	Dicumarol	NQO1; PDK1	1.046	0.9054	0.865583
736	Decamethonium bromide	AChE; nAChR	1.05	0.9531	0.907714
737	Triamcinolone acetonide	Glucocorticoid Receptor	1.025	0.7064	0.689171
738	Iproniazid Phosphate	MAO	1.052	0.9341	0.887928
739	Cianidanol	COX-1; COX-2	1.061	0.9376	0.883695
740	Meloxicam	COX	1.065	0.9683	0.909202
741	Bithionol	sAC	1.181	0.8714	0.737849
742	Tamoxifen Z-isomer citrate	ER	1.218	0.9591	0.787438
743	Sulfadoxine	DHPS; DHFR	1.204	1.024	0.850498
744	Triclabendazole	Tubulin	1.187	0.9835	0.828559
745	Ketoprofen	COX-1; COX-2; MRAP4	1.217	0.9939	0.81668
746	Bezafibrate	PPARα	1.22	1.068	0.87541
747	Chenodeoxycholic acid	Bile acid receptor	1.256	1.067	0.849522
748	Pyrimethamine	DHFR	1.151	0.9693	0.842137
749	Pregnenolone	mAChR	1.242	0.9507	0.765459
750	Adenosine	Nucleoside	1.143	0.9906	0.866667
751	Dehydroepiandrosterone acetate	Androgen Receptor	1.146	0.8557	0.746684
752	Flufenamic acid	COX	1.198	0.845	0.705342
753	Fenbufen	ATP systhesis	1.158	0.9501	0.820466
754	(R)-Naproxen	COX	1.168	0.9397	0.804538
755	Diphenidol hydrochloride	mAChR	1.168	0.9382	0.803253
756	Dendrid	Feline herpesvirus type-1(FHV-1)	1.2	0.9373	0.781083
757	Propafenone	MRP1; Potassium Channel; Sodium Channel	1.202	0.933	0.776206
758	Bufexamac	IFN-α	1.147	0.8818	0.768788
759	Cefepime Dihydrochloride Monohydrate	PBPs; Fts1	1.186	0.8895	0.75
760	Atomoxetine hydrochloride	5-HT; DA transporter; Norepinephrine (NE) transporter	1.124	0.8763	0.779626
761	Altrenogest	ER	1.253	0.9481	0.756664
762	Noradrenaline bitartrate	Adrenergic Receptor	1.158	0.8625	0.744819
763	Ranitidine Hydrochloride	H2 receptor	1.284	0.8839	0.688396
764	Cladribine	Adenosine deaminase (MM1.S cells); Adenosine deaminase (RPMI8226 cells); Adenosine deaminase (U266 cells)	0.2006	0.4933	2.45912
765	Desloratadine	H1 receptor	1.201	0.9673	0.805412
766	Pimozide	D2; Potassium Channel	1.072	0.9132	0.851866
767	Zebularine	Cytidine deaminase	1.331	1.081	0.812171
768	Quercetin	PI3Kγ; PI3Kδ	1.268	1.012	0.798107
769	L-Hyoscyamine	AChR	1.25	1.001	0.8008
770	Hydroxychloroquine sulfate	DNA; TLR9	1.21	0.9221	0.762066
771	Quinacrine dihydrochloride	DNA; Histamine N-methyltransferase; PLA2; PLCLP	1.285	0.9271	0.721479
772	Cefazolin sodium salt	PBPs; Peptidoglycan synthase; PON	1.269	0.9079	0.715445
773	Levamisole hydrochloride	nAChR; PLAP	1.211	0.8836	0.729645
774	Dexamethason acetate	Annexin A1; Glucocorticoid Receptor; IL receptor; iNOS	1.001	0.6848	0.684116
775	Penicillin G sodium salt	PBPs; GABAR	1.301	0.9168	0.704689
776	Thiabendazole	Tubulin β	1.228	1.009	0.821661
777	Adrenalone hydrochloride	α1-adrenergic receptor	1.121	0.8952	0.798573
778	Amstat	Plasminogen	1.239	1.018	0.82163
779	Ethopabate	Folate metabolism	1.212	0.9925	0.818894
780	Cefixime	PBPs	1.179	0.8551	0.725276
781	Sulfadiazine	DHPS	1.247	0.9126	0.731836
782	Nicotinamide	SIRT	1.226	0.9303	0.758809
783	Azelaic acid	DNA polymerase I; ThxR	1.253	0.9379	0.748524
784	Griseofulvin	Tubulin chain	1.215	0.9125	0.751029
785	Chlorpromazine hydrochloride	5-HT2A; D2	1.26	1.052	0.834921
786	Acetylleucine	Amino Acids and Derivatives	1.276	1.011	0.79232
787	Fluconazole	14-α Demethylase	1.284	1.097	0.854361
788	4-Methylumbelliferone	ASST	1.313	0.9926	0.755979
789	Sodium butanoate	H1 receptor	1.265	1.019	0.805534
790	Ibuprofen	COX-1; COX-2	1.191	0.9093	0.763476
791	Bemegrid	GABAR	1.32	0.835	0.632576
792	Tadalafil	PDE5	1.277	0.916	0.717306
793	Sucralose	Others	1.226	0.9573	0.780832
794	Meclofenoxate hydrochloride	COX; ALOX5	1.242	0.9359	0.753543
795	Fenofibric acid	MMP; PPARα	1.283	1.01	0.787217
796	Stavudine	Reverse Transcriptase	1.298	1.025	0.789676
797	Cefditoren pivoxil	PBPs	1.261	0.9165	0.726804
798	Capecitabine	Thymidine phosphorylase	1.245	0.9799	0.787068
799	Methocarbamol	CA1	1.319	0.9468	0.717817
800	Loxapine succinate salt	5-HT2 (bovine); 5-HT2 (bovine); 5-HT2 (human); D2; D4	1.128	0.9017	0.799379
801	Pentetrazol	GABAR	1.21	0.8125	0.671488
802	Mesna	Others	1.29	0.9296	0.72062
803	Gemfibrozil	PPARα	1.261	0.9552	0.757494
804	Zidovudine	Reverse Transcriptase; Telomerase reverse transcriptase	1.235	0.9468	0.76664
805	Azithromycin dihydrate	23S rRNA; 50S ribosome	1.372	1.019	0.742711
806	Diethylcarbamazine citrate	COX-1; ALOX5	1.344	1.033	0.768601
807	Aceclofenac	COX	1.282	1.092	0.851794
808	Hydroxytoluic acid	COX	1.332	1.071	0.804054
809	Ethynyl estradiol	ER	1.239	1.03	0.831316
810	Pemirolast potassium	H1 receptor	1.232	0.8471	0.687581
811	Fosfosal	COX	1.233	0.837	0.678832
812	Trifluridine	DNA/RNA Synthesis; Thymidylate synthase	0.8888	0.9291	1.04534
813	Hydroxyprogesterone	ER	1.347	0.9371	0.695694
814	Phenylbutazone	COX	1.341	0.919	0.685309
815	Clarithromycin	MRP1; 50S ribosome	1.375	1.007	0.732364
816	4-Aminohippuric Acid	Amino Acids and Derivatives	1.384	0.9544	0.689595
817	Butoconazole nitrate	ER	1.355	1.066	0.786716
818	Pizotifen	5-HT	1.357	1.037	0.764186
819	Lomefloxacin	Topo II; Topo IV	1.325	0.9948	0.750792
820	Agomelatine	5-HT	1.132	0.7968	0.703887
821	Bambuterol hydrochloride	AChR; β-adrenergic receptor	1.306	0.843	0.645482
822	Dasatinib	Abl; c-Kit (D816V); c-Kit (wt); Src	0.872	0.3476	0.398624
823	Hydrochlorothiazide	Carbonic anhydrase; Potassium Channel	1.267	0.962	0.759274
824	Levofloxacin Hemihydrate	DNA gyrase; Topo II; Topo IV	1.264	0.9108	0.72057
825	Axitinib	PDGFRβ; VEGFR1; VEGFR2; VEGFR3; c-kit	1.278	1.041	0.814554
826	Phenformin hydrochloride	AMPK; Potassium Channel	1.386	1.066	0.76912
827	Aciclovir	DNA synthesis	1.333	1.113	0.834959
828	Nialamide	AOA; AOB; COMT	1.37	1.011	0.737956
829	Candesartan	AT1 receptor	1.242	0.9583	0.771578
830	Captopril	ACE	1.21	0.9986	0.825289
831	Ramelteon	MT receptor (chicken); MT1 receptor; MT2 receptor	1.201	0.8567	0.713322
832	Toremifene citrate	ER	1.311	0.9365	0.71434
833	Mupirocin	DNA synthesis	1.294	0.9642	0.745131
834	Acemetacin	COX	1.341	0.9938	0.741089
835	Dicyclomine hydrochloride	mAChR	1.469	1.068	0.727025
836	Lornoxicam	COX-1; COX-2	1.304	1.029	0.78911
837	Fexofenadine hydrochloride	H1 receptor	1.365	1.021	0.747985
838	Duloxetine hydrochloride	Sert (Sodium-dependent); DA transporter; Noradrenaline transporter (Sodium-dependent)	1.313	1.097	0.835491
839	Trospium chloride	mAChR	1.243	1.009	0.811746
840	Trilostane	3 β-hydroxysteroid dehydrogenase	1.167	0.8965	0.768209
841	Otilonium bromide	mAChR; Calcium Channel	1.205	0.9033	0.749627
842	Ciclopirox	Na+/K+-ATPase	1.347	0.9201	0.683073
843	Levocetirizine	H1 receptor	1.274	0.9173	0.720016
844	AICAR (Acadesine)	AMPK	1.397	0.8954	0.640945
845	Cefaclor monohydrate	PBPs	1.338	1.206	0.901345
846	Indapamide	Potassium Channel	1.34	1.011	0.754478
847	Olmesartan Medoxomil	angiotensin II receptor	1.405	1.057	0.752313
848	Cyclobenzaprine hydrochloride	5-HT	1.397	1.04	0.744452
849	Teniposide	Topo II	0.2397	0.6526	2.72257
850	Nilotinib	Bcr-Abl	1.263	0.9652	0.764212
851	Nifuratel	Antibacterial	1.225	0.881	0.719184
852	Gliclazide	Potassium Channel	1.285	0.9195	0.715564
853	Azasetron hydrochloride	5-HT3	1.379	0.9294	0.673967
854	Aliskiren hemifumarate	Renin	1.243	0.9717	0.781738
855	Darifenacin HBr	M3 mAChR	1.303	0.993	0.762087
856	Sodium Phenylbutyrate	HDAC	1.358	0.9695	0.713918
857	Promestriene	ER	1.33	0.9517	0.715564
858	Rapamycin	mTOR; Autophagy	0.8329	0.8607	1.03338
859	Melphalan	DNA	1.154	0.9166	0.794281
860	Mitiglinide calcium	Potassium Channel	1.136	0.8568	0.754225
861	Iloperidone	α-adrenergic receptor; Dopamine	1.237	0.9012	0.728537
862	Drospirenone	Androgen Receptor; COX-2; PR; Mineralocorticoid Receptor	1.216	0.859	0.706414
863	Pirenzepine dihydrochloride	mAChR	1.325	0.8824	0.665962
864	Naftifine hydrochloride	Smoothened	1.293	0.8981	0.694586
865	Olsalazine disodium	COX; IFγ	1.286	1.002	0.77916
866	L-Cysteine methyl ester hydrochloride(Acdrile)	Amino Acids and Derivatives	1.276	1.018	0.797806
867	8-Methoxypsoralen	DNA	1.24	0.9874	0.79629
868	Doxepin hydrochloride	5-HT; HT; Sert (Sodium-dependent); mAChR; Adrenergic Receptor; Dopamine; Noradrenaline transporter (Sodium-dependent)	1.26	0.9745	0.773413
869	Raloxifene hydrochloride	ER; AO; SERM	1.214	0.9199	0.757743
870	Chlorpheniramine maleate	H1 receptor	1.215	0.9273	0.76321
871	Diclofenac sodium	COX-1; COX-2	1.212	0.8698	0.717657
872	Resveratrol	COX-1; COX-2; DNA polymerase α; IKKβ; LOX; Quinone reductase 2; SIRT1; SIRT2	1.283	0.907	0.706937
873	Tegaserod maleate	5-HT; Sert (Sodium-dependent)	1.275	0.9127	0.715843
874	Rebamipide	Free radical scavengers	1.238	0.9284	0.749919
875	Nifuroxazide	STAT1; STAT3; STAT5	1.217	0.9289	0.76327
876	Cisplatin	DNA synthesis	1.242	0.9186	0.739614
877	Aripiprazole	5-HT1A	1.311	0.9344	0.712738
878	Crizotinib	ALK; c-Met	0.7766	0.9615	1.23809
879	Nateglinide	Potassium Channel; PPARγ	1.195	0.9204	0.770209
880	Adefovir dipivoxil	Protein P; Reverse Transcriptase; Reverse Transcriptase	1.108	0.8692	0.784477
881	Rosuvastatin	HMG-CoA reductase	1.214	0.8012	0.659967
882	5Beta-Pregnane-3Alpha,20alpha-Diol	ER	1.245	0.8241	0.661928
883	3,4-Dimethoxyhydrocinnamic acid	Aromatase	1.264	0.8562	0.677373
884	SN38	Topo I	0.06929	0.263	3.79564
885	Diosmetin	CYP1A1; TrkB	1.26	0.9876	0.78381
886	4-Amino-5-imidazolecarboxamide	Endogenous Metabolite	1.232	0.8891	0.721672
887	2-(1-Piperazinyl)pyrimidine	α-adrenergic receptor	1.246	0.928	0.744783
888	Trolox	Antioxidant	1.181	0.8203	0.694581
889	ADP	Endogenous Metabolite	1.277	0.8676	0.679405
890	Y-27632 dihydrochloride	ROCK1 (p160ROCK); ROCK2	1.303	0.9563	0.733922
891	SB 431542	ALK5; ALK4; ALK7	1.315	0.8907	0.677338
892	TOS-ARG-OME hydrochloride	Amino Acids and Derivatives	1.226	0.8436	0.688091
893	8-Azaguanine	Purine nucleoside phosphorylase	0.5709	0.7805	1.36714
894	Acitretin	RAR; RXR	1.11	0.7978	0.718739
895	PIK75	DNA-PK; p110α; p110β; p110γ; p110δ	0.165	0.1721	1.04303
896	Adenosine 5'-monophosphate	5'-AMP-activated protein kinase	1.217	0.937	0.769926
897	Genistein	EGFR	1.255	0.922	0.734661
898	Apigenin	CYP2C9	1.221	0.9747	0.79828
899	LY310762	5-HT1D	1.218	0.8271	0.679064
900	Aloin	Others	1.133	0.9211	0.812974
901	Asenapine Maleate	5-HT2A; 5-HT2B; 5-HT2C; 5-HT6; 5-HT7	1.145	0.8713	0.760961
902	Aloe-emodin	HSV-1; HSV-2	1.301	0.8205	0.630669
903	Lumacaftor	F508del-CFTR	1.189	0.7834	0.658873
904	KU55933	ATM; ATR; DNA-PK; mTOR; PI3K	1.164	0.8584	0.737457
905	Vortioxetine	5-HT1A; 5-HT1B; 5-HT3A; 5-HT7; SERT	1.145	0.9142	0.798428
906	Carbinoxamine Maleate Salt	H1 receptor	1.153	0.9252	0.802428
907	Amygdalin	Others	1.257	0.8787	0.699045
908	Tenofovir alafenamide	Reverse Transcriptase	1.216	0.8289	0.681661
909	AZ 3146	Mps1	1.241	0.8544	0.688477
910	Tacrolimus	FKBP-12	1.134	0.7314	0.644974
911	Guanfacine hydrochloride	α2A-adrenoceptor	1.148	0.9134	0.795645
912	Indole-3-carbinol	NF-κB; p53	1.106	0.8099	0.732278
913	Varenicline Tartrate	mAChR	1.187	0.7941	0.668997
914	Chrysin	Antioxidant;Others	1.304	0.8613	0.660506
915	Scopolamine butylbromide	mAChR	1.069	0.9059	0.847428
916	TG100-115	PI3Kα; PI3Kβ; PI3Kγ; PI3Kδ	1.194	0.859	0.71943
917	Esomeprazole Magnesium	H+/K+-ATPase	1.208	0.9719	0.804553
918	Revaprazan hydrochloride	H+/K+-ATPase	1.146	0.8523	0.743717
919	SGC0946	DOT1L	1.155	0.8812	0.762944
920	KN93	CaMK	1.157	0.8457	0.730942
921	Nocodazole	Abl; Abl (E255K); Abl (T315I); microtubule	0.3253	0.5572	1.71288
922	Bortezomib	20S proteasome	0.06698	0.1455	2.17229
923	Candesartan Cilexetil	angiotensin II receptor	1.035	0.8391	0.810725
924	Bromfenac sodium	COX-2	1.123	0.8882	0.790917
925	Tianeptine sodium	5-HT	0.9891	0.8304	0.839551
926	BAY 87-2243	HIF-1α	0.7302	0.6905	0.945631
927	Telmisartan	angiotensin II type 1 receptor	1.12	0.8674	0.774464
928	Etoricoxib	COX	1.13	0.8661	0.76646
929	Nizatidine	AChE; H2 receptor	1.13	0.8159	0.722035
930	Norethindrone	ER	1.173	0.8152	0.69497
931	Midodrine hydrochloride	α1-adrenergic receptor	1.164	0.8076	0.693814
932	Pargyline hydrochloride	MAO	1.055	0.7837	0.742844
933	Mestranol	ER	1.087	0.7833	0.720607
934	Estriol	ER; MRP1	1.117	0.8546	0.765085
935	Desvenlafaxine	5-HT; Norepinephrine (NE)	1.019	0.7786	0.764082
936	Vorinostat	HDAC; HDAC1;HDAC2;HDAC3;HDAC6;HDAC8	1.028	0.7859	0.764494
937	Terbutaline Sulfate	β2-adrenergic receptor	0.9669	0.8273	0.855621
938	Tenoxicam	COX	1.155	0.8641	0.748139
939	Exemestane	Aromatase (human); Aromatase (rat)	1.125	0.7909	0.703022
940	Letrozole	Aromatase	1.092	0.8543	0.782326
941	Uridine	LSm6	1.141	0.7715	0.676161
942	Naproxen	COX	0.9918	0.7437	0.749849
943	Cyclocytidine hydrochloride	DNA/RNA Synthesis	0.1278	0.6217	4.86463
944	Chlormadinone acetate	Androgen Receptor	0.9924	0.7209	0.726421
945	Proadifen hydrochloride	CYP	0.9236	0.8015	0.8678
946	Doxifluridine	Thymidine phosphorylase	0.9799	0.8086	0.825186
947	Lomustine	DNA Alkylating; Stathmin-4	0.9935	0.778	0.78309
948	Valproic acid sodium salt	GABAR; HDAC2; HDAC9	1.027	0.7471	0.727459
949	Glipizide	ABCC; PPARγ	0.9903	0.7418	0.749066
950	Acetohydroxamic acid	MMP	1.001	0.7491	0.748352
951	Ezetimibe	NPC1L1; Nrf2; Sterol O-acyltransferase	1.094	0.7793	0.71234
952	Vecuronium bromide	nAChR	0.9901	0.7888	0.796687
953	Isotretinoin	RAR	0.766	0.6749	0.88107
954	Hodostin	AChR	0.9649	0.7841	0.812623
955	Hydralazine hydrochloride	MAO	1.005	0.7821	0.778209
956	Hydrocortisone	Glucocorticoid Receptor	1.018	0.6339	0.622692
957	Enalapril Maleate	ACE	1.001	0.7512	0.75045
958	Irbesartan	AT1 receptor	0.9976	0.7238	0.725541
959	Neostigmine bromide	AChE	1.063	0.7693	0.723706
960	Lomefloxacin hydrochloride	Topo II	0.9955	0.7373	0.740633
961	Famotidine	H2 receptor	1.083	1.006	0.928901
962	Rivastigmine tartrate	AChR	1.11	0.9348	0.842162
963	Rifapentine	RNA polymerase	1.063	1.084	1.01976
964	Cefotiam hydrochloride	PBPs	1.072	0.9156	0.854104
965	Enrofloxacin	DNA synthesis	1.03	0.8966	0.870485
966	Dypyridamole	PDE; PDE	0.9971	0.9675	0.970314
967	Trazodone hydrochloride	5-HT; Sert (Sodium-dependent); Adrenergic Receptor; H1 receptor	1.046	0.9938	0.950096
968	Pazufloxacin Mesylate	Topo II	1.041	0.983	0.944284
969	Imatinib Mesylate	v-Abl; c-Kit; PDGFR	1.159	1.011	0.872304
970	Rosiglitazone maleate	PPARγ	1.057	0.9528	0.901419
971	Paroxetine hydrochloride	5-HT; AChR; GRK2	1.127	0.9896	0.878083
972	Amlexanox	FGFR1; IL-3; Protein S100-P	1.124	0.9915	0.882117
973	Ciprofloxacin	Topo II; Topo IV	1.114	0.8737	0.784291
974	Glyburide	Bile salt export pump; Potassium Channel	1.077	0.9233	0.857289
975	Beta-Carotene	VA	1.073	0.961	0.89562
976	Lenalidomide	TNF-α	1.086	0.8967	0.825691
977	Amitraz	α-adrenergic receptor	1.118	0.9017	0.80653
978	Penciclovir	EBV; HCMV; HSV-1; HSV-2; VZV	1.038	0.9549	0.919942
979	Dopamine hydrochloride	5-HT; DA transporter; Dopamine	1.099	0.9569	0.870701
980	Ramipril	ACE	1.062	0.894	0.841808
981	Famciclovir	DNA polymerase; HSV	1.075	0.9571	0.890326
982	Tenofovir	Reverse Transcriptase	1.135	1.05	0.92511
983	Chlorzoxazone	Potassium Channel	1.145	1.009	0.881223
984	O-(4-Hydroxy-3-iodophenyl)-3,5-diiodo-L-tyrosine	TRα; TRβ	1.151	0.8979	0.780104
985	Tolazoline hydrochloride	α-adrenergic receptor	1.104	1.008	0.913043
986	Aminophylline	PDE	1.132	1.069	0.944346
987	Pentamidine isethionate	Antibacterial	1.036	1.005	0.970077
988	Melatonine	CAM; ER; melatonin receptor; MPO; RORβ	1.135	1.042	0.918062
989	Silibinin	Autophagy	1.135	1.049	0.924229
990	Methacholine Chloride	mAChR	1.052	0.9246	0.878897
991	Vinblastine sulfate	nAChR	0.3186	0.6027	1.89171
992	Mirabegron	β3-adrenoceptor	1.09	1.203	1.10367
993	MI 2 (MALT1 inhibitor)	MALT1	1.091	1.135	1.04033
994	Tipiracil hydrochloride	Nucleoside Antimetabolite/Analog	1.137	1.005	0.883905
995	HTH-01-015	NUAK1; NUAK2	1.108	1.015	0.916065
996	Dutasteride	5-α reductase	1.077	0.9751	0.905385
997	LY344864	5-HT1F	1.108	1.125	1.01534
998	Vipadenant	A1; A2A; A3	1.128	0.9536	0.84539
999	Abemaciclib	CDK4; CDK6	0.8392	0.9202	1.09652
1000	Adavosertib	Wee1	0.752	0.7997	1.06343
1001	A77-01	ALK5	1.182	1.166	0.986464
1002	Edoxaban Tosylate Monohydrate	Factor Xa; Factor Xa; Thrombin	1.148	1.033	0.899826
1003	BET bromodomain inhibitor	BET bromodomain	0.8342	0.7528	0.902421
1004	SKF86002	p38 MAPK	1.233	0.9533	0.773155
1005	AMI1	PRMT1; yeast Hmt1p	1.202	1.091	0.907654
1006	Irbinitinib	EGFR; HER2/ErbB2; p95 HER2	1.095	0.9058	0.827215
1007	BX471	human CCR1	1.186	1.071	0.903035
1008	Vemurafenib	ACK1; MAP4K5 (KHS1); B-Raf; B-Raf (V600E); C-Raf; SRMS; FGR	1.196	1.118	0.934783
1009	Pilaralisib	PI3Kα; PI3Kβ; PI3Kγ; PI3Kδ	1.122	0.99	0.882353
1010	GSK923295	CENP-E	0.1497	0.665	4.44222
1011	Ponatinib	Abl; c-Kit; FGFR1; PDGFRα; c-Src; VEGFR2	1.19	0.8342	0.701008
1012	UNC1215	L3MBTL3; L3MBTL3; L3MBTL3-D274A	1.157	1.003	0.866897
1013	Pimavanserin	5-HT2A	1.163	0.8763	0.753482
1014	RGB-286638 free base	CDK1/cyclinB1; CDK2/cyclinE; CDK3/cyclinE; CDK4/cyclinD1; CDK9/cyclinT1; p35-CDK5	0.2527	0.2997	1.18599
1015	CFTRinh172	CFTR	1.249	1.027	0.822258
1016	Danusertib	Aurora A; Aurora B; Aurora C; Abl; RET; FGFR1; TrkA	0.8409	0.8157	0.970032
1017	EPZ6438	EZH2; EZH2	1.288	1.081	0.839286
1018	Lexibulin	microtubule	0.3366	0.6107	1.81432
1019	GSK2636771	PI3Kβ	1.092	0.9588	0.878022
1020	LY2409881 trihydrochloride	IKK2	1.072	0.9583	0.893937
1021	APD 668	GPR119	1.151	0.9605	0.834492
1022	Panobinostat	HDAC	0.09404	0.2195	2.33411
1023	Amitifadine hydrochloride	5-HT; Dopamine; Norepinephrine (NE)	1.25	1.056	0.8448
1024	XMD17109	ERK5	1.232	1.025	0.831981
1025	GSK126	EZH2	1.252	1.127	0.90016
1026	SR9243	LXR	1.193	1.122	0.940486
1027	GSK503	EZH2	1.282	1.083	0.844774
1028	XL147 analogue	DNA-PK; PI3Kα; PI3Kβ; PI3Kγ; PI3Kδ	1.231	1.076	0.874086
1029	CEP32496	Abl1; c-Kit; RET; PDGFRβ; Lck	1.279	1.119	0.874902
1030	UNC0379	SETD8	1.158	1.02	0.880829
1031	Mps1-IN-2	Mps1	1.152	0.9783	0.849219
1032	LCL161	cIAP	1.184	1.092	0.922297
1033	Rociletinib	EGFR (L858R/T790M); EGFR (wt)	1.066	0.8956	0.84015
1034	Pomalidomide	TNF-α	1.165	1.044	0.896137
1035	GSK1059615	mTOR; PI3Kα; PI3Kβ; PI3Kγ; PI3Kδ	1.106	0.9208	0.83255
1036	Baricitinib Phosphate	JAK1; JAK2; JAK3; Tyk2	1.302	1.102	0.84639
1037	INK 128	mTOR; mTOR; PI3Kα; PI3Kγ; PI3Kδ	0.2222	0.3699	1.66472
1038	AZD2932	c-Kit; FLT3; PDGFRβ; VEGFR2	1.212	1.132	0.933993
1039	ETP46464	ATM; ATR; DNA-PK; mTOR; PI3Kα	1.061	0.9248	0.871631
1040	SB 742457	5-HT6	1.094	0.9023	0.824771
1041	BX795	CDK2/CyclinE; Chk1; c-Kit; PDK1	1.068	0.9595	0.898408
1042	AF 353	P2X3	1.155	1.062	0.919481
1043	Eniporide	Na+/K+-ATPase	1.236	1.04	0.841424
1044	BX912	CDK2/CyclinE; Chk1; PDK1; PKA; VEGFR2 (KDR)	1.298	1.025	0.789676
1045	IDH1-IN-1	mutant IDH1 R132H	1.194	1.179	0.987437
1046	SB202190	p38α; p38β	1.187	1.168	0.983993
1047	Alisertib	Aurora A	0.2362	0.7214	3.05419
1048	A205804	E-selectin; ICAM-1	1.106	1.038	0.938517
1049	VER49009	HSP90β	1.154	1.135	0.983536
1050	VX661	VFTR	1.121	1.034	0.922391
1051	KenPaullone	CDK1/CyclinB; CDK2/CyclinA; CDK2/CyclinE; CDK5/p35; GSK-3β	1.119	0.9566	0.85487
1052	BMS833923	Smoothened	1.203	0.9902	0.823109
1053	Brexpiprazole	5-HT1A; 5-HT2A; α1B-adrenergic receptor; α2C receptors; D2L	1.256	1.1	0.875796
1054	SP2509	LSD1	1.01	0.8397	0.831386
1055	RU58841	Androgen Receptor	1.27	1.229	0.967717
1056	ESI09	EPAC1; EPAC2	1.269	1.054	0.830575
1057	PF 431396	FAK; PYK2	1.159	1.084	0.935289
1058	ML204	TRPC4; TRPC5	1.18	1.122	0.950847
1059	FPH2	Others	1.137	1.063	0.934916
1060	PIK294	p110α; p110α; p110β; p110γ; p110δ	1.078	0.9221	0.85538
1061	CX5461	Pol I-driven transcription of rRNA	0.2329	0.8091	3.47402
1062	CNX1351	PI3Kα	1.007	0.8923	0.886097
1063	SGX523	Abl; c-Met; p38α; B-Raf (V599E); C-Raf	1.282	0.9803	0.764665
1064	Afatinib	EGFR (L858R); EGFR (L858R/T790M); EGFR (wt); HER2; HER4	1.102	0.829	0.752269
1065	ABT199	Bcl-2	1.195	1.099	0.919665
1066	HS173	PI3Kα	0.9434	1.003	1.06318
1067	HA14-1	Bcl-2	1.129	1.059	0.937998
1068	SD208	TGF-βRI (ALK5)	1.106	1.144	1.03436
1069	MLN9708	20S proteasome; 20S proteasome	0.1059	0.3422	3.23135
1070	VER50589	HSP90β	0.2374	0.8437	3.55392
1071	SW033291	15-PGDH; 15-PGDH	1.265	1	0.790514
1072	Indacaterol	β-adrenoceptor	1.075	0.9312	0.866233
1073	ABT737	Bcl-2; Bcl-B; Bcl-w; Bcl-xL	1.236	1.088	0.880259
1074	SC514	Aurora B; CDK2/CyclinA; IKK2; p38α; PRAK	1.208	1.015	0.840232
1075	Ganetespib	HSP90	0.1183	0.5076	4.29079
1076	Ixazomib	20S proteasome; 20S proteasome	0.1208	0.2799	2.31705
1077	YM155	Survivin	0.07957	0.07563	0.950484
1078	SBI0206965	ULK1	1.139	1.077	0.945566
1079	PHA793887	CDK1/CyclinB; CDK2/CyclinA; CDK2/CyclinE; CDK5/p25; CDK7/CyclinH	0.977	1.004	1.02764
1080	Bikinin	GSK-3; Shaggy-like kinase	1.149	0.9978	0.868407
1081	Veliparib dihydrochloride	PARP1; PARP2	1.178	0.9599	0.814856
1082	CNX774	BTK	1.142	0.9616	0.842032
1083	AGI5198	R132C-IDH1; R132H-IDH1	1.258	1.099	0.873609
1084	(+)-JQ-1	BRD4 (1); BRD4 (2)	0.9284	0.8297	0.893688
1085	NVP-BEP800	HSP90β	1.06	1.062	1.00189
1086	Piboserod	5-HT4	1.221	1.157	0.947584
1087	Navitoclax	Bcl-2; Bcl-w; Bcl-xL	1.191	1.083	0.90932
1088	Triapine	RR	1.234	1.027	0.832253
1089	Ispinesib	KSP (HsEg5)	0.2795	0.7775	2.78175
1090	AEE788	c-Abl; c-Fms; EGFR; HER2/ErbB2; FLT1	1.036	0.8391	0.809942
1091	MPI0479605	Mps1	1.29	1.126	0.872868
1092	SB743921	KSP; KSP (Colo205 cells); KSP (MV522 cells); KSP (MX1 cells); KSP (SKOV3 cells)	0.2472	0.6754	2.7322
1093	Pexidartinib	Kit; CSF-1R; FLT3	1.268	1.026	0.809148
1094	K 02288	ALK1; ALK2; ALK3; ALK4; ALK6	1.252	1.006	0.803514
1095	Menadiol Diacetate	VK4	1.181	1.106	0.936494
1096	Thymopentin	ER	1.202	1.048	0.87188
1097	Formoterol	β2-adrenergic receptor	1.022	0.931	0.910959
1098	Bimatoprost	PGF2; PGE2	1.226	0.9816	0.800653
1099	Vonoprazan fumarate	H+/K+-ATPase	1.177	1.011	0.858963
1100	Etonogestrel	ER	1.066	0.908	0.851782
1101	Ulipristal acetate	PR	1.247	0.9971	0.799599
1102	Etravirine	Reverse Transcriptase	1.245	0.9969	0.800723
1103	Dexmedetomidine	α2 receptor	1.246	0.8932	0.716854
1104	Ivabradine hydrochloride	Adrenergic Receptor	1.265	0.9535	0.753755
1105	Dienogest	ER	1.247	0.9692	0.777225
1106	Tauroursodeoxycholic Acid	CYP3A	1.234	0.9924	0.804214
1107	Bazedoxifene acetate	ERα; ERβ	1.235	1.073	0.868826
1108	Didanosine	Reverse Transcriptase	1.112	0.9527	0.856745
1109	Prucalopride	5-HT1A; 5-HT1B; 5-HT3; 5-HT4A; 5-HT4B	1.179	1.028	0.871925
1110	Tirofiban hydrochloride monohydrate	GPIIb/IIIa; GPIIb/IIIa	1.107	1.016	0.917796
1111	Allylestrenol	ER	1.217	0.9945	0.817173
1112	Alosetron hydrochloride	5-HT3	1.143	0.9353	0.818285
1113	Tolmetin	COX-1; COX-2	1.263	1.047	0.828979
1114	Alizapride hydrochloride	Dopamine	1.224	1.014	0.828431
1115	Cabazitaxel	microtubule	0.2001	0.4717	2.35732
1116	Alcaftadine	H1 receptor; H2 receptor; H4 receptor	1.201	0.9876	0.822315
1117	Pazopanib	c-Kit; PDGFR; VEGFR1; VEGFR2; VEGFR3	1.191	0.8942	0.750798
1118	Amfenac Sodium Monohydrate	COX-1; COX-2	1.188	0.9375	0.789141
1119	Pimobendan	PDE3	1.125	0.9311	0.827644
1120	Wnt-C59	Porcn	0.9618	0.9108	0.946974
1121	VX702	p38α	1.135	0.9806	0.863965
1122	PFI3	SMARCA2; SMARCA4; PB1(5) bromodomains	1.199	0.9246	0.771143
1123	IRAK-1/4 Inhibitor	IRAK-1; IRAK-4	1.138	0.897	0.788225
1124	AG1024	IGF-1R; Insulin Receptor	1.212	0.9342	0.770792
1125	KN62	CaMKⅤ; CaMKII	1.104	0.9987	0.90462
1126	WHI-P154	EGFR; JAK3; Src; VEGFR	1.215	1.023	0.841975
1127	SC 79	Akt	1.171	0.9827	0.839197
1128	ITD1	TGFβ	1.146	1.049	0.915358
1129	SBE 13 hydrochloride	PLK1; PLK2; PLK3	1.113	0.9778	0.878527
1130	IM12	GSK-3β	1.166	0.9318	0.799142
1131	Dactolisib	ATR; mTOR (p70S6K); p110α; p110γ; p110δ	0.2577	0.4349	1.68762
1132	GSK2578215A	LRRK2 (G2019S); LRRK2 (WT)	1.086	0.9806	0.902947
1133	Losmapimod	p38α; p38β	1.106	0.9862	0.891682
1134	PIK-75 hydrochloride	DNA-PK; p110α; p110β; p110γ; p110δ	0.1531	0.2005	1.3096
1135	LRRK2-IN-1	DCLK1; DCLK2; LRRK2 (A2016T); LRRK2 (G2019S); LRRK2 (WT)	1.115	0.9895	0.887444
1136	AS605240	PI3Kα; PI3Kβ; PI3Kγ; PI3Kδ	1.059	0.9889	0.933805
1137	UNC669	L3MBTL1; L3MBTL3; L3MBTL4	1.094	0.9678	0.884644
1138	DY131	ERRβ; ERRγ	1.072	0.9732	0.907836
1139	TCS PIM-1 1	Pim1	1.017	0.9072	0.892035
1140	Silmitasertib	CK2	1.023	0.8336	0.814858
1141	RU 24969 hemisuccinate	5-HT1A; 5-HT1B	1.105	0.9656	0.873846
1142	Osimertinib	EGFR (Exon 19 deletion); EGFR (L858R/T790M )	1.031	0.7417	0.719399
1143	YK-4-279	RNA helicase A	1.117	0.9344	0.836526
1144	RI1	RAD51	1.166	0.9633	0.826158
1145	Endoxifen Z-isomer	hERG Potassium Channel; ER; ERR	1.176	0.9637	0.819473
1146	LY2874455	FGFR1; FGFR2; FGFR3; FGFR4; VEGFR2	0.4293	0.7735	1.80177
1147	TAK875	GPR40(FFA1)	1.06	0.9684	0.913585
1148	ENMD2076	Aurora A; RET; FLT3; Src; VEGFR3/FLT4	0.8029	0.7306	0.909951
1149	Ro 3306	CDK1; ERK; PKA; PKCδ; SGK	1.082	0.9197	0.85
1150	ANA12	TrkB	1.067	0.8824	0.826992
1151	CEP28122	ALK	0.799	0.9575	1.19837
1152	IC261	CK1; CDK5	0.8291	0.8818	1.06356
1153	PCI24781	HDAC1; HDAC10; HDAC2; HDAC3/SMRT; HDAC6	0.758	0.8232	1.08602
1154	Decernotinib	JAK1; JAK2; JAK3; Tyk2	1.124	0.9968	0.886833
1155	Dacomitinib	EGFR; HER2/ErbB2; HER2/ErbB2	1.05	0.7675	0.730952
1156	TAS301	PKC	1.05	0.9287	0.884476
1157	EPZ011989	EZH2	1.195	0.9604	0.803682
1158	Taxifolin	β-adrenergic receptor; TNF-α; Collagenase Tyrosinase; Beta-nerve growth factor; VEGFR2	1.076	0.9247	0.859387
1159	Benactyzine hydrochloride	mAChR	1.101	0.8832	0.80218
1160	Mecamylamine hydrochloride	nAChR	1.116	0.8675	0.77733
1161	Nafamostat mesylate	Serine Protease	1.08	0.9289	0.860093
1162	CEP37440	ALK; FAK	0.6065	0.8601	1.41814
1163	Palomid 529	mTORC1; mTORC2	1.04	0.9058	0.870962
1164	PTC209	BMI-1	1.041	0.9921	0.953026
1165	Pyridone 6	JAK1; JAK2; JAK3; Tyk2	0.9803	0.9072	0.925431
1166	TAK901	CLK2; JAK3; c-Src; FGR; Yes1	0.6174	0.7547	1.22238
1167	Telbivudine	Protein P; Reverse Transcriptase; Reverse Transcriptase	1.058	0.8806	0.832325
1168	Fasudil hydrochloride	PKA; PKG; PKC; ROCK2; MLCK	1.045	0.9358	0.895502
1169	J147	BDNF	1.117	0.8895	0.796329
1170	GTS 21 dihydrochloride	α4β2 nAChR	1.126	0.8707	0.773268
1171	Alda-1	ALDH2	1.131	0.9371	0.828559
1172	HA130	ATX (autotaxin)	1.065	0.815	0.765258
1173	AP26113	ALK; EGFR (C797S/del19); EGFR (del19); EGFR (del19); IGF-1R	0.5651	0.7727	1.36737
1174	TGX221	p110α; p110β; p110γ; p110δ	0.9934	0.8518	0.857459
1175	UNC1999	EZH1; EZH2	1.117	1.126	1.00806
1176	CGK 733	ATM; ATR	1.068	0.8614	0.806554
1177	Histone Deacetylase Inhibitor III	HDAC	1.045	0.8445	0.808134
1178	Fimasartan	AGTR1	1.025	0.8643	0.84322
1179	Fedratinib	JAK2; JAK2 (V617F); RET; FLT3	1.037	0.876	0.844744
1180	Neratinib	EGFR; HER2	0.8792	0.5868	0.667425
1181	Kaempferol	ER	1.086	0.8698	0.800921
1182	Menatetrenone	VK2 analog	1.006	0.8319	0.826938
1183	RITA	Mdm2; p53	0.9347	0.8868	0.948754
1184	Avanafil	PDE5	0.9656	0.9844	1.01947
1185	Acotiamide hydrochloride	AChE	0.9336	0.9084	0.973008
1186	PF 573228	FAK	0.9835	0.7805	0.793594
1187	Ilomastat	MMP-1; MMP-12; MMP-2; MMP-26; MMP-7; MMP-8; MMP-9	0.9909	0.8771	0.885155
1188	Ebastine	H1 receptor	0.9673	0.9601	0.992557
1189	TBB	CK2; CDK2; GSK-3β	0.9422	0.8423	0.893972
1190	Ciproxifan maleate	H3 receptor	0.9516	0.8368	0.879361
1191	BMS303141	ACL	1.006	0.8833	0.878032
1192	ZCL 278	Cdc42 GTPase	0.9243	0.7894	0.854052
1193	Pelitinib	EGFR; HER2/ErbB2; MEK; Raf; Src	0.6846	0.5066	0.739994
1194	Radotinib	Bcr-Abl1	0.9722	0.9639	0.991463
1195	Rilpivirine	Reverse Transcriptase	0.9828	0.8833	0.898759
1196	Apalutamide	Androgen Receptor; GABAR	0.8977	0.7898	0.879804
1197	Berbamine dihydrochloride	Abl	1.025	0.8407	0.820195
1198	Astragaloside IV	ERS	0.927	0.8231	0.887918
1199	(-)-Epigallocatechin Gallate	Autophagy	0.9305	0.8749	0.940247
1200	Fangchinoline	FAK	0.9677	0.9056	0.935827
1201	Notoginsenoside R1	ERK1; ERK2	1.11	0.9663	0.870541
1202	Panaxadiol	Others	1.092	0.9092	0.832601
1203	Daphnetin	EGFR; PKA; PKC	1.077	1.001	0.929434
1204	Schizandrin A	CYP3A	1.113	0.8775	0.78841
1205	Ginsenoside Rg1	Amyloid-β; NF-κB	1.075	0.9465	0.880465
1206	Wogonin	CDK	1.097	0.9369	0.854057
1207	Helenine	STAT	1.064	0.9033	0.848966
1208	Stevioside	TLR2	1.082	0.9106	0.84159
1209	Costunolide	FPTase; Telomerase (MCF-7); Telomerase (MDA-MB-231)	1.126	0.9639	0.856039
1210	Isoimperatorin	AChE	1.065	0.9334	0.876432
1211	(±)-Shikonin	Others	1.141	1.022	0.895706
1212	Schizandrin B	ATR	1.059	0.9553	0.902077
1213	Ginsenoside Rb1	Autophagy; IRAK; Mitophagy; (Na,K)-ATPase; NF-κB	1.06	0.9764	0.921132
1214	Gossypol acetic acid	Bcl-2	1.084	0.9265	0.854705
1215	Daidzin	ALDH-Ⅰ; ALDH-Ⅱ	1.14	0.9734	0.85386
1216	Ginsenoside Re	Amyloid-β; JNK; NF-κB	1.03	0.8515	0.826699
1217	Isorhamnetin	MEK; PI3K	1.128	0.8893	0.788387
1218	Coenzyme Q10	Endogenous Metabolite	1.024	0.9483	0.926074
1219	(-)-Epicatechin gallate	COX	1.09	0.9799	0.898991
1220	Arctiin	AdipoR	1.131	0.8895	0.786472
1221	Ginsenoside Rd	Calcium Channel; COX; P450; NF-κB	1.182	0.9656	0.81692
1222	Icariin	PDE5	1.197	0.9666	0.807519
1223	Rosmarinic acid	MAO-A; MAO-B; COMT	1.078	0.9997	0.927365
1224	Chlorogenic Acid	Others	1.143	0.9933	0.869029
1225	Epicatechin	COX	1.091	0.9522	0.872777
1226	Genistin	Others	1.103	1.067	0.967362
1227	Schisandrin	Autophagy	1.161	0.9687	0.834367
1228	Curcumol	JAK	1.094	0.9617	0.879068
1229	Sennoside B	PDGFR	1.111	0.9807	0.882718
1230	Scopolamine HBr	mAChR	1.074	0.901	0.83892
1231	Nobiletin	MMP	1.245	0.9206	0.739438
1232	(20S)-Protopanaxadiol	Apoptosis inducer	1.102	0.9081	0.824047
1233	Forskolin	Adenylyl cyclase (AC)	1.124	1.104	0.982206
1234	(+)-Bicuculline	GABAR	1.157	0.9711	0.839326
1235	Loganin	NF-κB	1.065	1.02	0.957746
1236	Asiaticoside	p38 MAPK; TGFβ1	1.107	1	0.903342
1237	Sodium Aescinate	HIF-1α	1.105	0.9961	0.901448
1238	7,8-Dihydroxyflavone	TrkB	1.102	0.8855	0.803539
1239	(-)-Huperzine A	AChE (G4 form)	1.1	0.9796	0.890545
1240	Ginsenoside Rh2	EGFR	0.9903	0.8805	0.889125
1241	Lupeol	P-Akt	1.146	0.9818	0.856719
1242	Cyclopamine	Smoothened	1.167	0.9992	0.856213
1243	Glycitin	Others	1.174	0.9579	0.815928
1244	Monocrotaline	TGFβ	1.175	0.9408	0.800681
1245	Tubeimoside I	Others	1.121	0.994	0.886708
1246	Picroside I	MMP	1.111	1.064	0.957696
1247	Ginsenoside Rg2	GSK-3β	1.15	0.9943	0.864609
1248	Tetrahydroberberine THB	5-HT; Dopamine	1.096	1.012	0.923358
1249	Beta-Sitosterol	PPL	1.142	0.9578	0.838704
1250	Triptolide	heat shock factor (HSF1)( in ALL cell lines); Mdm2	0.1209	0.1328	1.09843
1251	Pimasertib	MEK1/2 (MM cell line)	0.8599	0.836	0.972206
1252	PD1-PDL1 inhibitor 2	PD-1/PD-L1	1.113	0.9284	0.834142
1253	Atorvastatin Calcium	HMG-CoA reductase	1.131	1.003	0.886826
1254	Marbofloxacin	Topo II; Topo IV	1.163	0.9568	0.8227
1255	Foretinib	Met; RON; Tie-2; VEGFR2 (KDR); VEGFR3/FLT4	1.082	0.8822	0.815342
1256	NS 1619	Potassium Channel	1.132	1.048	0.925795
1257	ALK inhibitor 2	ALK	0.4484	1.002	2.23461
1258	PFK158	PFKFB3	1.159	1.058	0.912856
1259	Pinometostat	DOT1L	1.143	1.036	0.906387
1260	C-DIM12	Nurr1 activator	1.011	0.929	0.918892
1261	Fangchinoline	FAK	1.154	1.029	0.891681
1262	Carbendazim	Antifungal	1.181	1.004	0.850127
1263	LY2608204	glucokinase	1.159	0.9306	0.802934
1264	CUDC101	EGFR; HDAC; HDAC1; HDAC10; HDAC2; HDAC3; HDAC4; HDAC5; HDAC6; HDAC7; HDAC8; HDAC9; HER2	1.171	0.9699	0.828266
1265	L67	DNA ligases	1.11	1.032	0.92973
1266	Vorapaxar sulfate	PAR-1	1.123	1.032	0.918967
1267	Thioguanine	DNMT1	0.5816	0.8291	1.42555
1268	N-Ethylmaleimide	Cysteine protease	1.159	1.052	0.907679
1269	Selumetinib	MEK1; ERK1; ERK2	1.044	0.9272	0.888123
1270	Enzalutamide	Androgen Receptor	1.093	0.8862	0.810796
1271	Entinostat	HDAC1; HDAC3	0.7863	0.7637	0.971258
1272	Saracatinib	c-Src; Lck; BLK; EGFR (L858R); EGFR (L861Q); c-Yes; FGR; Fyn; Lyn	1.13	0.9977	0.88292
1273	Lapatinib Ditosylate	EGFR; HER2/ErbB2	1.148	0.7956	0.693031
1274	Emtricitabine	Reverse Transcriptase	1.132	1.028	0.908127
1275	Irinotecan	Topo I	0.9393	1.071	1.14021
1276	DAPT	γ secretase(Aβ)	1.145	1.063	0.928384
1277	Psoralen	DNA/RNA Synthesis	1.123	1.053	0.937667
1278	Arctigenin	Autophagy; MMP	1.098	0.9846	0.896721
1279	Saikosaponin A	NF-κB	1.106	0.9609	0.868807
1280	Betulin	SREBP( K562 cell)	1.037	0.9224	0.889489
1281	Alvelestat	neutrophil elastase; neutrophil elastase	1.125	1.003	0.891556
1282	Atopaxar Hydrobromide	PAR-1	1.181	1.064	0.900931
1283	Bethanechol chloride	muscarinic receptor	1.207	0.9977	0.826595
1284	PD0325901	MEK	0.8204	0.7731	0.942345
1285	Clinofibrate	HMGCR	1.117	1.088	0.974038
1286	Tyramine	MAOs	1.094	0.9982	0.912431
1287	Pyrazolanthrone	Aurora A; JNK1; JNK2; JNK3; TrkA	1.163	1.002	0.861565
1288	Iniparib	PARP1	1.15	1.085	0.943478
1289	Imatinib	v-Abl; c-Kit; PDGFR	1.113	1.017	0.913747
1290	Palbociclib hydrochloride	CDK4/CyclinD1; CDK4/CyclinD3; CDK6/CyclinD2	1.057	0.9065	0.857616
1291	Palbociclib Isethionate	CDK4/CyclinD1; CDK4/CyclinD3; CDK6/CyclinD2	1.11	0.9675	0.871622
1292	Rolipram	PDE4B; PDE4D	1.117	1.002	0.897046
1293	Adenine hydrochloride	DNA/RNA Synthesis	1.146	1.014	0.884817
1294	Carmustine	DNA Alkylator	1.158	0.9359	0.808204
1295	Torin 1	DNA-PK; mTOR; mTORC1; mTORC2; p110γ	0.3065	0.4366	1.42447
1296	Benidipine hydrochloride	EGFR (L861Q); c-Src; c-Yes; Lck; Lyn	1.139	1.041	0.91396
1297	Ozagrel	Thromboxane A2 synthetase	1.169	1.055	0.902481
1298	Rupatadine Fumarate	H1 receptor; PAFR	1.143	1.013	0.886264
1299	Abiraterone	CYP17	1.101	0.9955	0.904178
1300	Quetiapine Fumarate	HT; Adrenergic Receptor; Dopamine	1.072	0.9397	0.876586
1301	Orantinib	FGFR1; PDGFRβ; Flk1	1.16	0.8856	0.763448
1302	PJ34	PARP1; PARP2	1.148	0.9603	0.836498
1303	Pyrrolidinedithiocarbamate ammonium	NF-κB	1.174	0.9977	0.84983
1304	SCH772984	ERK1; ERK2	1.061	0.8308	0.783035
1305	LY2835219	CDK4; CDK6	0.912	0.8391	0.920066
1306	Abietic Acid	MMP-1; PPARα; PPARγ	1.206	0.9944	0.824544
1307	Z-VAD(OMe)-FMK	Pan-caspase	1.177	1.005	0.853866
1308	Obatoclax Mesylate	Bcl-2	1.04	0.9037	0.868942
1309	U104	Carbonic anhydrase I; Carbonic anhydrase II; Carbonic anhydrase IX; CAXII	1.057	0.9756	0.92299
1310	UMI77	Mcl-1	1.041	0.8967	0.861383
1311	Mangostin	IDH1-R132H	1.141	1.009	0.884312
1312	Gestodene	ER	1.175	0.9446	0.803915
1313	Bufalin	Na+/K+-ATPase	0.4226	0.1005	0.237814
1315	Teriflunomide	Dihydroorotate Dehydrogenase	1.136	1.005	0.884683
1316	Protoporphyrin IX	Ferritin light chain	1.142	0.9792	0.857443
1317	TPCA1	IKK2	1.074	1.035	0.963687
1318	Pemetrexed Disodium Hydrate	DHFR; DHFR; GARFT; Thymidylate synthase	0.1869	0.6716	3.59337
1319	Histamine	HT	1.09	0.9803	0.899358
1320	PD 169316	p38	1.096	0.866	0.790146
1321	Solifenacin succinate	mAChR	1.248	0.9485	0.760016
1322	Thonzonium Bromide	DHPS	1.185	0.9492	0.801013
1323	Synephrine	Adrenergic Receptor	1.141	0.9172	0.803856
1324	Salubrinal	eIF-2α	1.203	0.9498	0.789526
1325	10-Deacetylbaccatin III	Others	1.128	1.01	0.89539
1326	Moclobemide	MAO-A (5-HT)	1.158	1.052	0.908463
1327	IBMX	PDE3; PDE4; PDE5	1.129	1.053	0.932684
1328	Sarsasapogenin	Apoptosis inducer	1.128	0.9677	0.85789
1329	Ginkgolide A	GABAR	1.101	0.9734	0.884105
1330	Swertiamarin	Others	1.108	0.9444	0.852347
1331	Diazoxide	Na+/K+-ATPase; Potassium Channel	1.168	0.9738	0.833733
1332	Cephalomannine	Microtubule/Tubulin	0.1285	0.508	3.95331
1333	Oridonin	Akt1,Akt2	1.168	0.9829	0.841524
1334	Ginkgolide B	PAFR	1.175	1.034	0.88
1335	Ibudilast	PDE	1.076	1.005	0.934015
1336	Tangeretin	Notch-1	1.151	0.9934	0.863076
1337	Citalopram HBr	5-HT	1.166	1.021	0.875643
1338	Daunorubicin hydrochloride	DNA synthesis	0.2627	0.6385	2.43053
1339	Vandetanib	EGFR; VEGFR2; VEGFR3	1.09	0.9051	0.830367
1340	Forsythin	AMPK	1.004	0.9132	0.909562
1341	Diphemanil mesylate	AChR	1.095	0.9546	0.871781
1342	Moroxydine hydrochloride	DNA viruses; RNA viruses	1.151	0.9514	0.826586
1343	Paliperidone	5-HT; β-adrenergic receptor; Dopamine; H1 receptor	1.174	0.9291	0.791397
1344	Medroxyprogesterone Acetate	ER; PR	1.241	0.8334	0.671555
1345	Amrinone	PDE; TNF-α	1.172	1.016	0.866894
1346	Megestrol acetate	ER; Glucocorticoid Receptor	1.104	0.8808	0.797826
1347	Lafutidine	HT	1.144	1.064	0.93007
1348	Nepafenac	COX-1; COX-2	1.136	1.037	0.912852
1349	Gatifloxacin	Topo IV	1.063	0.9269	0.871966
1350	Pefloxacin Mesylate Dihydrate	Topo II	1.042	1.002	0.961612
1351	Fleroxacin	DNA gyrase; Topo II; Topo IV	1.15	0.9005	0.783043
1352	Dacarbazine	DNA polymerase beta	1.097	0.9841	0.897083
1353	Phentolamine mesilate	α-adrenergic receptor	1.201	0.9557	0.795754
1354	Mycophenolic acid	DH; UGT	1.155	1.073	0.929004
1355	Paclitaxel	microtubule	0.1276	0.472	3.69906
1356	Clinafloxacin	Antibacterial	1.185	0.957	0.807595
1357	Dehydrocostus Lactone	IKKβ	1.127	0.9842	0.873292
1358	Levonorgestrel	ER; SRD5A1	1.174	1.038	0.884157
1359	Terfenadine	HT; mAChR; Potassium Channel	1.063	0.8711	0.819473
1360	Hydroxyzine dihydrochloride	H1 receptor	1.041	0.8456	0.812296
1361	Etoposide	Topo II	1.069	0.9701	0.907484
1362	Nicorandil	Potassium Channel	1.138	0.9157	0.804657
1363	Doxazosin mesylate	α1-adrenergic receptor	1.093	0.9106	0.83312
1364	Flumazenil	GABAR	1.094	0.9124	0.834004
1365	Mizolastine	H1 receptor	1.123	0.8949	0.796883
1366	Trapidil	PDE; PDGFR	1.126	0.9238	0.820426
1367	Galanthamine HBr	AChE	1.118	0.9247	0.827102
1368	Sulfacetamide sodium salt hydrate	DHPS	1.103	0.9227	0.836537
1369	Lapatinib	EGFR; HER2/ErbB2	1.086	0.781	0.719153
1370	Voriconazole	14-α Demethylase	1.021	0.9768	0.956709
1371	Azatadine Maleate	HT; Cholinergic	1.143	0.9585	0.838583
1372	Sorafenib tosylate	c-Kit; FLT3; mPDGFRβ; PDGFRβ; B-Raf; B-Raf (V599E); Raf-1; VEGFR2/Flk1	1.161	1.036	0.892334
1373	Anisodamine	Adrenergic Receptor	1.096	0.9451	0.862318
1374	Fludarabine	STAT1; DNA synthesis	1.124	0.9297	0.827135
1375	Roflumilast	PDE4A1; PDE4A4; PDE4B1; PDE4B2; PDE4C1	1.068	0.9809	0.918446
1376	Fipronil	GABA; GluCl channels	1.111	0.905	0.814581
1377	Danofloxacin mesylate	DNA-gyrase	1.112	0.9473	0.851888
1378	Pamidronate disodium salt	HAP; FPPS	1.076	0.98	0.910781
1379	Chlorprothixene	5-HT6; 5-HT7; D2; D3; H1 receptor	0.9968	0.945	0.948034
1380	DL-O-Tyrosine	Amino Acids and Derivatives	1.027	0.8801	0.856962
1381	Dipivefrin hydrochloride	AChR; Adrenergic Receptor	1.051	0.9687	0.921694
1382	10058-F4	c-Myc-MAX	1.136	0.9466	0.833275
1383	Lanatoside C	Na+/K+-ATPase	0.4266	0.4898	1.14815
1384	Harmine	MAO	1.066	0.8007	0.751126
1385	Methotrexate	hDHFR	0.3748	0.6804	1.81537
1386	Balicatib	Cathepsin K	1.072	0.9339	0.871175
1387	AZD1080	GSK-3α; GSK-3β	1.091	0.9393	0.860953
1388	4E1rcat	eIF-4E; eIF-4 g	1.112	0.9139	0.821853
1389	BIX02188	ERK5; MEK1; MEK2; MEK5; TGFβR1	1.15	0.9674	0.841217
1390	TMP269	HDAC4; HDAC5; HDAC7; HDAC9	1.033	0.8896	0.861181
1391	GW 9508	GPR120; GPR40(FFA1)	1.103	0.9196	0.833726
1392	Ibrutinib	BLK; Bmx; BTK; FGR; CSK	1.055	0.7406	0.701991
1393	Walrycin B	bacterial WalR response regulator	0.8812	0.7408	0.840672
1394	StemRegenin 1	AhR	1.102	1.013	0.919238
1395	Ruxolitinib	JAK1; JAK2	1.04	0.8909	0.856635
1396	CK636	Arp2/3 complex (Bovine); Arp2/3 complex (Fission yeast); Human Arp2/3 complex	1.06	0.9193	0.867264
1397	NMS 873	p97	0.7848	0.7988	1.01784
1398	TTP 22	CK2	1.087	0.8694	0.799816
1399	ZM 336372	C-Raf	1.032	0.8988	0.87093
1400	Momelotinib	JAK1; JAK2; JAK3	0.9835	0.9017	0.916828
1401	Isoindigotin	DNA polymerase	1.072	0.9337	0.870989
1402	Belinostat	HDAC	0.8505	0.8667	1.01905
1403	Necrostatin-1	RIP1	1.001	0.772	0.771229
1404	Buparlisib	p110α; p110β; p110γ; p110δ; Vps34	0.906	0.7661	0.845585
1405	KPT330	CRM1; XPO1	0.9612	0.7817	0.813254
1406	Voxtalisib Analogue	DNA-PK; PI3Kα; PI3Kβ; PI3Kγ; PI3Kδ	1.025	0.9196	0.897171
1407	Reversine	A3; Aurora A; Aurora B; Aurora C	1.021	0.9733	0.953281
1408	IOX 2	PHD2	1.103	0.865	0.784225
1409	Clemizole	NS4BH1 histamine receptor	1.063	0.8283	0.77921
1410	Nexturastat A	HDAC6	0.9637	0.8773	0.910346
1411	Purmorphamine	Smoothened	1.06	0.8892	0.838868
1412	Tenovin-6	SIRT1; SIRT2; SIRT3	1.064	0.9048	0.850376
1413	B-Raf IN 1	B-Raf; C-Raf	1.053	0.8408	0.798481
1414	GNF2	Bcr-Abl (K562 cell line); Bcr-Abl (SUP-B15 cell line)	1.073	0.8584	0.8
1415	Afatinib Dimaleate	EGFR (L858R); EGFR (L858R/T790M); EGFR (wt); HER2	1.022	0.6677	0.653327
1416	Nintedanib	FLT3; Lck; VEGFR1; VEGFR2; VEGFR3; FGPR1; FGFR2; FGFR3; PDGFRα; PDGFRβ	0.9582	0.7834	0.817575
1417	6-BIO	CDK1/CyclinB; CDK2/CyclinA; CDK5/p35; GSK-3; Tyk2	0.8091	0.7243	0.895192
1418	Cabozantinib Malate	Kit; c-Met; AXL; VEGFR2/KDR; VEGFR3/FLT4	1.003	0.7248	0.722632
1419	Apitolisib	mTOR; p110α; p110β; p110γ; p110δ	0.524	0.4339	0.828053
1420	Dinaciclib	CDK1; CDK2; CDK5; CDK9	0.1176	0.1699	1.44473
1421	Afuresertib	Akt1; Akt2; Akt3	0.7175	0.6187	0.8623
1422	Everolimus	mTOR (FKBP12)	0.7039	0.7401	1.05143
1423	Palbociclib	CDK4; CDK6	0.8687	0.7969	0.917348
1424	Canagliflozin	hSGLT2; mSGLT2; rSGLT2	1.046	0.8822	0.843403
1425	Parecoxib	COX-2	0.9501	0.8279	0.871382
1426	Aprepitant	NK1	0.9854	0.9066	0.920032
1427	LDK378	ALK; IGF-1R; Insulin Receptor	0.5554	0.8957	1.61271
1428	Regorafenib	Kit; RET; Raf-1; VEGFR1; VEGFR2	0.996	0.8925	0.896084
1429	Obeticholic Acid	FXR	0.9629	0.7884	0.818777
1430	Carfilzomib	Proteasome	0.03486	0.1159	3.32473
1431	Plerixafor	CXCL12; CXCR4	0.9721	0.8425	0.86668
1432	MBX2982	GPR119	0.9621	0.83	0.862696
1433	Vidarabine	DNA polymerase; DNA polymerase; Tyrosine Kinases	0.9681	0.7867	0.812623
1434	Methazolamide	bCAIV; hCAI; hCAII	0.9547	0.8154	0.85409
1435	Streptozocin	DNA alkylator	0.9679	0.7906	0.81682
1436	Fosinopril sodium	ACE	0.9745	0.8154	0.836737
1437	Rizatriptan benzoate	5-HT	0.9539	0.8241	0.863927
1438	Rifabutin	RNA polymerase; Endoplasmin; HSP90	0.9604	0.7683	0.799979
1439	Decitabine	DNA methyltransferase (DNMT)	0.6505	0.8273	1.27179
1440	Ondansetron hydrochloride	5-HT3	0.923	0.8458	0.91636
1441	Azelastine hydrochloride	H1 receptor	1.054	1.031	0.978178
1442	2-Methoxyestradiol	HIF-1α; HIF-2α; Microtubule depolymerization	1.058	0.9727	0.919376
1443	Imipenem	PBPs; β-Lactamase	1.042	0.9558	0.917274
1444	Fluvastatin sodium salt	HMG-CoA reductase	1.041	0.8691	0.83487
1445	Xylazine hydrochloride	α2 adrenergic receptor	0.9652	0.9139	0.94685
1446	Sorafenib	c-Kit; FLT3; mPDGFRβ; PDGFRβ; B-Raf; B-Raf (V599E); Raf-1; VEGFR2/Flk2	1.054	0.9922	0.941366
1447	Atovaquone	DHODH; Cytochrome b	1.021	0.8918	0.873457
1448	Silodosin	β-adrenergic receptor	1.073	0.9731	0.906897
1449	Acalisib	PI3Kδ	1.025	0.8745	0.853171
1450	Gemifloxacin mesylate	DNA gyrase; Topo II	0.9995	0.9767	0.977189
1451	PF04217903	c-Met	1.037	1.031	0.994214
1452	AS 602801	JNK1; JNK2; JNK3	1.049	0.9732	0.927741
1453	GSK0660	PPARβ; PPARδ	1.024	0.8352	0.815625
1454	NVP-BVU972	Met	0.9582	0.8498	0.886871
1455	Berzosertib	ATM; ATR	0.9764	0.948	0.970914
1456	JNK-IN-8	Kit (V559D); Kit (V559D,T670I); JNK1; JNK2; JNK3	0.9512	0.8413	0.884462
1457	Taladegib	Smoothened	0.9967	0.8736	0.876492
1458	Regadenoson	A2A	0.9811	0.9303	0.948221
1459	Crenolanib	PDGFRα; PDGFRβ; FLT3	1.051	0.9096	0.865461
1460	Timapiprant	DP2	0.9603	0.9272	0.965532
1461	Apremilast	PDE4	1.118	0.967	0.864937
1462	Tivozanib	EphB2; PDGFRα; VEGFR1; VEGFR2; VEGFR3	1.064	1.122	1.05451
1463	Perifosine	Akt	1.095	0.9136	0.834338
1464	Ataluren	CFTR	1.058	0.9155	0.865312
1465	BML277	Chk2	0.9964	1.009	1.01265
1466	Cabozantinib	c-Kit; c-Met; VEGFR2/KDR; FLT4; Axl	1.026	0.8719	0.849805
1467	JW55	TNKS1; TNKS2	1.06	0.9187	0.866698
1468	GW 788388	ALK5	1.012	0.9735	0.961957
1469	NLG919	IDO	0.968	0.8971	0.926756
1470	WH-4-023	Lck; Src	0.9517	0.9444	0.99233
1471	AGI6780	IDH2 R140Q mutant	1.089	0.9458	0.868503
1472	VGX1027	IL-10; IL-1β; TNF-α	1.026	0.932	0.908382
1473	ICILIN	TRPM8	1.04	0.8064	0.775385
1474	WHI-P258	EGFR; JAK3	1.004	0.8865	0.882968
1475	GTPL5846	GPR84	1.006	0.9866	0.980716
1476	KX1004	Src-PTK	1.013	0.9549	0.942646
1477	TH588	MTH1	1.059	0.9547	0.901511
1478	RG108	DNA methyltransferase (DNMT)	1.049	0.9152	0.87245
1479	Chidamide	HDAC1; HDAC2; HDAC3; HDAC8	0.8616	0.7749	0.899373
1480	CYM5442	SphK	0.9701	0.8872	0.914545
1481	ISRIB	PERK	1.183	0.9981	0.843702
1482	NG52	Cdc28p	1.044	0.9095	0.871169
1483	Bohemine	CDK	1.076	0.9514	0.884201
1484	WHI-P180	CDK2; EGFR	1.035	0.8487	0.82
1485	GNF5	Bcr-Abl	1.019	0.954	0.936212
1486	CZC54252	LRRK2	0.573	0.914	1.59511
1487	OAC2	OCT4	1.045	1.036	0.991388
1488	AVN944	IMPDH	0.4982	0.6935	1.39201
1489	Apilimod	IL-12; IL-23	0.5319	0.6445	1.21169
1490	Oclacitinib	JAKs	0.9873	0.9368	0.94885
1491	Fexaramine	FXR	1.122	0.9931	0.885116
1492	SB-3CT	MMP-2; MMP-9	1.041	1.029	0.988473
1493	AM095	LPA1	1.051	0.8743	0.831874
1494	LY294002	p110α; p110β; p110δ	1.015	1.152	1.13498
1495	RQ00203078	TRPM8	1.022	0.969	0.948141
1496	RKI1313	ROCK1; ROCK2	1.045	1.107	1.05933
1497	TP0903	AXL	0.08692	0.1225	1.40934
1498	Isx 9	Wnt/β-catenin	0.9698	0.9263	0.955145
1499	Taselisib	PI3Kα; PI3Kβ; PI3Kγ; PI3Kδ	0.6123	0.4252	0.694431
1500	CHS 828	NAMPT; NAMPT	0.05573	0.1646	2.95353
1501	Pictilisib	p110α; p110β; p110γ; p110δ	0.8694	0.6691	0.769611
1502	Omecamtiv mecarbil	ATPase	1.081	1.027	0.950046
1503	CCG1423	RhoA	1.075	1.02	0.948837
1504	PF4708671	p70 S6K	1.064	1.013	0.952068
1505	ML323	USP1-UAF1	1	0.9817	0.9817
1506	ABT751	microtubule	0.7582	0.9052	1.19388
1507	Pirodavir	Rhinovirus	1.037	0.959	0.924783
1508	LY2090314	GSK-3α; GSK-3β	0.297	0.4757	1.60168
1509	PD153035 hydrochloride	EGFR; EGFR	0.975	0.7977	0.818154
1510	RGFP 966	HDAC3	0.9806	0.9246	0.942892
1511	TAK063	PDE10A	1.082	0.9935	0.918207
1512	LY2584702 tosylate	p70 S6K	1.036	0.9604	0.927027
1513	Kartogenin	Smad4; Smad5	1.023	0.9603	0.93871
1514	Torezolid	MAO-A; MAO-B	0.9274	0.898	0.968298
1515	SB525334	TβR1; ALK5; ALK4	0.9839	1.057	1.0743
1516	MS436	BRD4 (1); BRD4 (2)	1.074	0.9771	0.909777
1517	OTSSP167	MELK	0.6575	0.6641	1.01004
1518	D64131	Tubulin polymerization	0.1968	0.5759	2.92632
1519	ZM 306416	Abl; Src; VEGFR1	0.9875	0.8651	0.876051
1520	Tozasertib	Aurora A; Aurora B; Aurora C	0.1584	0.762	4.81061
1521	Linifanib	Kit; CSF-1R; FLT3; VEGFR1/FLT1; VEGFR2/KDR	1.002	0.8813	0.879541
1522	Apabetalone	BD2	1.092	0.9856	0.902564
1523	O4I2	OCT3; OCT4	1.047	1.005	0.959885
1524	NS6180	KCa3.1 channel	1.04	0.9514	0.914808
1525	O4I1	OCT3; OCT4	1.074	0.9903	0.922067
1526	KU60019	ATM	1.049	0.961	0.916111
1527	MC1568	HD1-A (Maize); HD1-B (Maize)	1.051	0.8397	0.798953
1528	GlyH101	CFTR	1.052	0.8579	0.815494
1529	SB505124	ALK4; ALK5	0.9167	1.023	1.11596
1530	PHT427	Akt; PDK1	1.01	0.9241	0.91495
1531	KNK437	HSP105; HSP40; HSP72	1.104	0.9792	0.886957
1532	Rocilinostat	HDAC1; HDAC2; HDAC3; HDAC6; HDAC8	1.015	0.9227	0.909064
1533	TG6-10-1	5-HT2B	1.055	0.9854	0.934028
1534	PFK015	PFKFB3	1.068	0.9751	0.913015
1535	GSK2801	BAZ2A; BAZ2B	0.991	0.9586	0.967306
1536	Tyrphostin 9	EGFR; PDGFR	1.04	0.8648	0.831538
1537	BRL54443	5-HT1A; 5-HT1B; 5-HT1D; 5-HT1E; 5-HT1F	1.06	0.933	0.880189
1538	Fingolimod hydrochloride	S1P	1.017	0.9199	0.904523
1539	Lomeguatrib	O6-alkylguanine-DNA-alkyltransferas	0.9713	0.9213	0.948523
1540	Sal003	eIF-2α phosphatase	0.8868	0.9377	1.0574
1541	S3I201	STAT3	0.9693	0.8985	0.926958
1542	PNU 282987	α7 nAChR	0.9426	0.9306	0.987269
1543	SKLB1002	VEGFR2	0.8921	1.071	1.20054
1544	P22077	USP2; USP4; USP47; USP5; USP7	0.9627	0.9801	1.01807
1545	R406 free base	Syk	0.7208	0.649	0.900388
1546	HMN214	PLK1	0.6135	0.9259	1.50921
1547	FH535	PPARγ; PPARδ; Wnt/β-catenin	0.8818	0.9528	1.08052
1548	Veliparib	PARP1; PARP2	0.8648	0.8898	1.02891
1549	Chlorotrianisene	ER	0.908	0.9255	1.01927
1550	PF562271	CDK1/CyclinB; CDK2/CyclinE; CDK3/CyclinE; FAK; PYK2	0.8549	0.9341	1.09264
1551	ID8	DYRK	0.955	0.928	0.971728
1552	EHop016	Rac1	1.022	0.9486	0.92818
1553	Torkinib	mTOR; mTORC1; mTORC2; p110δ	0.7468	0.7332	0.981789
1554	Vismodegib	Hedgehog	0.9332	0.9878	1.05851
1555	Cediranib	c-Kit; PDGFRβ; VEGFR1/FLT1; VEGFR2/KDR; VEGFR3/FLT4	0.8823	0.8915	1.01043
1556	NU7026	ATM; ATR; DNA-PK; PI3K	0.9698	0.917	0.945556
1557	ML141	cdc42	0.8993	0.916	1.01857
1558	D 4476	ALK5; CK1; CK1δ	0.9911	0.9466	0.9551
1559	Tiagabine	GABA	0.8775	0.9267	1.05607
1560	Ostarine	Androgen Receptor	0.5378	0.9036	1.68018
1561	Binimetinib	MEK	0.8304	0.8246	0.993015
1562	UNBS5162	CXCL	0.9783	0.9544	0.97557
1563	Nedaplatin	DNA synthesis	0.9987	0.8941	0.895264
1564	NSC319726	p53 (R175)	0.136	0.3623	2.66397
1565	Galunisertib	TβRI	1.014	0.9714	0.957988
1566	GZD824 Dimesylate	Abl; Abl (E255K); Abl (H396P); Abl (M351T); Abl (Q252H)	0.5742	0.3302	0.575061
1567	AZD5438	CDK1; CDK2; CDK9	0.7855	0.9138	1.16334
1568	KI8751	c-Kit; EGFR; FGFR2; PDGFRα; VEGFR2	1.076	0.966	0.89777
1569	PP121	Hck; mTOR; PDGFR; Src; VEGFR	0.6223	0.7822	1.25695
1570	MK8745	Aurora A; Aurora B	0.5314	0.7719	1.45258
1571	Semaxanib	VEGFR2/Flk1	0.9238	0.8067	0.873241
1572	SRT1720 hydrochloride	SIRT1	0.9853	0.9162	0.929869
1573	PD 151746	m-calpain; μ-Calpain	0.9902	0.8433	0.851646
1574	INH1	Hec1	1.013	0.9771	0.964561
1575	PAC1	Procaspase-3	0.9457	0.8979	0.949455
1576	Mocetinostat	HDAC1; HDAC11; HDAC2; HDAC3	0.4558	0.6666	1.46248
1577	Roxadustat	HIF-PH	0.938	0.9408	1.00299
1578	PLX4720	B-Raf; B-Raf (V600E); C-Raf-1 (Y340D/Y341D)	0.9277	0.8986	0.968632
1579	KU0063794	mTORC1; mTORC2	0.8201	0.765	0.932813
1580	Ivacaftor	F508del-CFTR; G551D-CFTR	0.8245	0.8986	1.08987
1581	Andarine	Androgen Receptor	1.039	0.917	0.882579
1582	Plinabulin	Tubulin	0.2898	0.5971	2.06039
1583	BMS777607	Met; RON; AXL; Mer; Tyro3	1.031	0.9062	0.878952
1584	Tegafur	DNA synthesis	0.9879	0.8713	0.881972
1585	Pifithrin-α	p53	0.8988	0.7605	0.846128
1586	SL327	AP-1; MEK1; MEK2	0.9593	0.9256	0.96487
1587	MLN0905	PLK1	0.1782	0.6766	3.79686
1588	IWP-L6	Porcn	0.9134	0.8869	0.970988
1589	PI3K-IN-2	pPKB; pS6	0.6897	0.7737	1.12179
1590	IWP2	Wnt	0.842	0.912	1.08314
1591	Mutant EGFR inhibitor	EGFR (mutant)	0.4664	0.6599	1.41488
1592	GSK2256098	FAK	0.962	0.8889	0.924012
1593	BG45	HDAC1; HDAC2; HDAC3; HDAC6	0.9868	0.8425	0.85377
1594	SB590885	B-Raf	1.056	1.124	1.06439
1595	C7280948	PRMT1	0.952	0.9096	0.955462
1596	Roscovitine	Cdc2/CyclinB; CDK2/CyclinA; CDK2/CyclinE; CDK5/p35	0.9323	0.9556	1.02499
1597	BQU57	Ral	0.891	0.8358	0.938047
1598	Quizartinib	FLT3 (ITD); FLT3 (WT)	0.9676	0.8896	0.919388
1599	Tizoxanide	Antiviral	0.9368	0.8801	0.939475
1600	AG490	EGFR; HER2/ErbB2; JAK2	0.8706	0.8974	1.03078
1601	CID755673	PKD1; PKD2; PKD3	0.9573	0.924	0.965215
1602	Nimorazole	Antiparasitic	0.9382	0.8686	0.925815
1603	PF06447475	G2019S LRRK2; LRRK2	1.007	0.9746	0.967825
1604	LR510444	Microtubule disruptor	0.3188	0.5997	1.88112
1605	NS 11394	GABAA	0.9884	0.9227	0.933529
1606	UNC0064-12	VEGFR	0.7347	0.7793	1.06071
1607	Esculin	Antibacterial;Antiviral	0.9091	0.8554	0.940931
1608	Altiratinib	c-Met; Tie-2; VEGFR	1.06	0.8957	0.845
1609	FLT3-IN-1	FLT3	0.8939	0.8938	0.999888
1610	AZD1208	Pim1; Pim2; Pim3	0.8161	0.9328	1.143
1611	SantacruzaMate A	HDAC2; HDAC4; HDAC6	0.9738	0.9597	0.985521
1612	TAE684	ALK	0.4209	0.942	2.23806
1613	BVT 2733	11β-HSD1	0.9094	0.9277	1.02012
1614	OF1	BRPF1B; BRPF2	0.8875	0.9214	1.0382
1615	WS3	ErbB3-Binding Protein-1 (EBP1); IκB kinase	0.208	0.2825	1.35817
1616	AG1478	EGFR; HER2; PDGFR	0.8771	0.7588	0.865124
1617	LY2109761	TβRI; TβRII	0.9329	0.978	1.04834
1618	Cerdulatinib	JAK1; JAKs; Syk	0.6832	0.7792	1.14052
1619	Trametinib	MEK1; MEK2	0.4026	0.5996	1.48932
1620	WS6	ErbB3-Binding Protein-1 (EBP2); IκB kinase	1.023	1.116	1.09091
1621	KY02111	Wnt	1.004	0.8886	0.88506
1622	FTI 277 hydrochloride	Farnesyl transferase (FTase); GGTase I	0.8971	1.099	1.22506
1623	Pritelivir	helicase primase	0.8696	0.8494	0.976771
1624	Amuvatinib	c-Kit (D816H); FLT3 (D835Y); PDGFRα (V561D)	0.8932	0.9144	1.02373
1625	CPI203	BRD4	0.7285	0.7601	1.04338
1626	A 769662	AMPK; FAS	0.969	0.9543	0.98483
1627	AZD2461	PARP	0.928	0.874	0.94181
1628	Spebrutinib	BRK; BTK; c-Src; Lyn; Yes	0.8224	0.7744	0.941634
1629	C646	p300/CBP	0.883	0.8545	0.967724
1630	Brivanib Alaninate	FGFR1; Flk1; VEGFR1; VEGFR2	0.9138	0.9328	1.02079
1631	I-BET151	BRD2; BRD3; BRD4	0.8823	0.8965	1.01609
1632	ARRY380	EGFR; HER2; p95 HER2	0.8963	1.04	1.16033
1633	CI1040	MEK1; MEK2	0.8494	0.8641	1.01731
1634	CGI1746	BTK	0.8477	0.8941	1.05474
1635	FG2216	PHD2	0.9336	1.102	1.18038
1636	AZ5104	EGFR (L858R); EGFR (L858R/T790M); EGFR (L861Q); EGFR (wildtype); HER2/ErbB2	0.6383	0.5414	0.848191
1637	Apatinib	c-Kit; RET; c-Src; VEGFR2	0.8799	0.8635	0.981362
1638	PRT062607 hydrochloride	MLK1; FGR; Syk	0.8477	0.8873	1.04671
1639	Osu03012	PDK1	0.937	0.8907	0.950587
1640	ALK5 Inhibitor IV	ALK4; ALK5; ALK7	0.8936	0.9632	1.07789
1641	Baricitinib	Chk2; JAK1; JAK2; JAK3; Tyk2	0.886	0.9922	1.11986
1642	VE821	ATR	1.007	1.015	1.00794
1643	GSK1292263	GPR119	0.8959	0.8738	0.975332
1644	AT13148	Akt1; Akt2; Akt3; PKA; ROCK1; ROCK2; p70 S6K; RSK1; SGK3	0.9125	1.023	1.1211
1645	Cilengitide	αVβ3 integrin; αVβ5 integrin	0.8753	0.8204	0.937279
1646	Apixaban	Factor Xa (human); Factor Xa (rabbit)	0.8941	0.8531	0.954144
1647	Avasimibe	ACAT; CYP1A2; CYP2C19; CYP2C9	0.9825	0.8573	0.87257
1648	Ramatroban	CRTh2; TXA2R	0.8146	0.8875	1.08949
1649	4EGI1	eIF-4E/eIF-4 g	0.8843	0.8722	0.986317
1650	IOWH032	CFTR	0.9152	0.819	0.894886
1651	TCS 5861528	TRPA1	0.9444	0.8735	0.924926
1652	Dapagliflozin	hSGLT2	0.7796	0.9482	1.21626
1653	Lurasidone hydrochloride	5-HT1A; 5-HT2A; 5-HT7; D2; Norepinephrine α2C	0.9249	0.9474	1.02433
1654	UNC0631	G9a	0.9807	1.055	1.07576
1655	Camostat mesilate	epithelial sodium channel (ENaC)	0.8292	0.9559	1.1528
1656	STF31	GLUT1	0.9476	0.9795	1.03366
1657	Pirfenidone	TGFβ2	0.888	0.8379	0.943581
1658	Cevimeline hydrochloride hemihydrate	mAChR	0.8872	0.7967	0.897994
1659	KW2449	Aurora A; Abl; Abl (T315I); Kit; FGFR1; FLT3; FLT3 (D835Y); JAK2; Src	0.9172	0.8377	0.913323
1660	Glycopyrrolate	mAChR M1	0.8355	0.8001	0.95763
1661	Tideglusib	GSK-3β	0.7989	0.8195	1.02579
1662	BRD7716	DNA gyrase	0.8386	0.8283	0.987718
1663	PD173955	Bcr-Abl; Src	0.5412	0.6652	1.22912
1664	WIKI4	TNKS2	0.7435	0.8977	1.2074
1665	AT9283	Aurora A; Aurora B; Abl1 (T315I); JAK2; JAK3	0.106	0.5622	5.30377
1666	BMS754807	Met; IGF-1R; Insulin Receptor; TrkA; TrkB	0.5958	0.6014	1.0094
1667	Tenovin3	SIRT2	0.8439	0.7336	0.869297
1668	TG101209	RET; FLT3; JAK2; JAK3	0.7901	0.7836	0.991773
1669	Fenretinide	RAR/RAX	0.7455	0.7921	1.06251
1670	AR-A014418	GSK-3β; GSK-3β	0.7922	0.7637	0.964024
1671	Pixantrone dimaleate	Topoisomerase	0.4046	0.6613	1.63445
1672	Luminespib	HSP90α; HSP90β	0.05521	0.4796	8.68683
1673	Omipalisib	mTORC1; p110α; p110β; p110γ; p110δ	0.1482	0.261	1.76113
1674	CID2011756	PKD	0.7747	0.8158	1.05305
1675	AZD8055	mTOR	0.2188	0.3765	1.72075
1676	PR619	JOSD2; SENP6 core; UCH-L3; USP4; USP8	0.779	0.783	1.00513
1677	AWD 131-138	GABAR	0.8084	0.9189	1.13669
1678	Thiazovivin	ROCK	0.7887	0.8403	1.06542
1679	WZ811	CXCR4	0.8141	0.8014	0.9844
1680	7ACC2	lactate transport	0.8274	0.7894	0.954073
1681	CHIR98014	bFGFR; GSK-3α; GSK-3β; p70 S6K; c-Src	1.062	1.141	1.07439
1682	Masitinib	Abl1; c-Fms; Kit; Hck; PDGFRα; PDGFRβ; Lyn B; Src	1.058	1.028	0.971645
1683	CCT137690	Aurora A; Aurora B; Aurora C	1.037	0.9046	0.872324
1684	GSK2606414	eIF-2AK1 (HRI); eIF-2AK2 (PKR); eIF-2AK3 (PERK)	1.039	0.952	0.916266
1685	SNS-314 Mesylate	Aurora A; Aurora B; Aurora C	0.1259	0.8668	6.88483
1686	MK0752	Aβ	1.059	0.9907	0.935505
1687	LGK974	Porcn	1.039	0.8925	0.858999
1688	CH5132799	mTOR; PI3Kα; PI3Kβ; PI3Kγ; PI3Kδ	0.9259	0.7553	0.815747
1689	GSK1838705A	ALK; IGF-1R; Insulin Receptor; JNK3; RSK1	0.4983	0.8324	1.67048
1690	PluriSln 1	SCD	1.056	0.9327	0.883239
1691	TBPB	M1 mAChR	1.043	1.023	0.980825
1692	SGI-1776 free base	FLT3; Pim1; Pim2; Pim3	0.9939	0.8598	0.865077
1693	GLPG0634 analogue	JAK1; JAK2; JAK3	0.9608	0.918	0.955454
1694	FK866	NMPRTase	0.271	0.4519	1.66753
1695	SB216763	GSK-3α; GSK-3β	1.005	1.041	1.03582
1696	RI2	RAD51	1.004	0.9561	0.952291
1697	G749	Aurora B; RET; FLT3; FLT3 (D835Y); Mer	1.058	0.9731	0.919754
1698	INCB024360 analogue	IDO1	1.012	1.004	0.992095
1699	DCC2036	Abl1; p-Abl1 (native); p-Abl1 (T315I); u-Abl1 (native); FLT3	1.267	1.016	0.801894
1700	Poziotinib	HER1; HER2; HER4	0.9745	0.6485	0.665469
1701	Gandotinib	FLT3; JAK1; JAK2; JAK2; JAK2 (V617F)	0.9838	0.982	0.99817
1702	FLI06	Notch	1.115	0.9953	0.892646
1703	KRCA0008	ACK; ALK	0.6276	1.013	1.61409
1704	MI2	Menin-MLL	1.06	0.9227	0.870472
1705	GSK650394	SGK1; SGK2	1.048	1.042	0.994275
1706	GANT61	GLI1	1.038	1.089	1.04913
1707	GZD 824	Abl (E254K)	0.7304	0.4232	0.579409
1708	PD173074	EGFR; FGFR1; Insulin Receptor; c-Src; VEGFR2	0.9933	0.7151	0.719923
1709	LY2811376	BACE1; Aβ	1.067	1.058	0.991565
1710	Rostafuroxin	Na+/K+-ATPase	1.034	0.9879	0.955416
1711	WAY-100635 Maleate	5-HT	1.087	1.076	0.98988
1712	IWR-1-endo	Wnt	1.095	0.9258	0.845479
1713	MK8245	SCD1 (human); SCD1 (mouse); SCD1 (rat)	1.081	0.9928	0.918409
1714	PD 98059	MEK1	1.064	0.9535	0.896147
1715	GSK429286A	ROCK1; ROCK2	1.079	1.109	1.0278
1716	XL019	FLT3; JAK1; JAK2; JAK3; PDGFRβ	1.056	0.9337	0.884186
1717	GSK2656157	PERK	1.083	1.002	0.925208
1718	GW 2580	c-Fms	1.058	0.9999	0.945085
1719	Flavopiridol hydrochloride	CDK1; CDK2; CDK4; CDK6; CDK7	0.4971	0.7445	1.49769
1720	PIK93	ATM; C2β; DNA-PK; hsVps34; mTORC1; p110α; p110β; p110γ; p110δ; PI3KIIIβ	1.045	0.8886	0.850335
1721	Fruquintinib	VEGFR	1.062	0.9327	0.878249
1722	Elacridar	P-gp (P-glycoprotein)	1.026	1.01	0.984405
1723	IC87114	PI3Kβ; PI3Kγ; PI3Kδ	1.106	1.073	0.970163
1724	RO 3280	PLK1	0.1705	0.7287	4.2739
1725	WHI-P131	JAK3; JAK3	1.02	0.9919	0.972451
1726	LY364947	CK1δ; MLK-7K; TGFβRI; TGFβRII; RIPK2	1.048	1.165	1.11164
1727	Purvalanol A	Cdc2/CyclinB; CDK2/CyclinA; CDK2/CyclinE; CDK4/CyclinD1	1.095	1.088	0.993607
1728	OSI 930	CSF-1R; FLT1; C-Raf; Lck; VEGFR2 (KDR)	1.137	1.023	0.899736
1729	Bioymifi	DR5	1.124	1.052	0.935943
1730	BMS794833	Met; VEGFR2	1.137	1.017	0.894459
1731	1H-Pyrazole-3-acetamide	Aurora B	0.2683	0.8632	3.21729
1732	A66	p110α; p110γ; p110δ; PI3Kβ	1.007	0.91	0.903674
1733	AZD7545	PDHK1; PDHK2	0.992	0.9971	1.00514
1734	PD153035	EGFR	1.035	0.939	0.907246
1735	Serdemetan	HDM2; Mdm2; p53	0.9977	0.9946	0.996893
1736	JNJ7777120	H4 receptor	1.106	1.039	0.939421
1737	BPR1J097	FLT3	1.146	0.9795	0.854712
1738	DMH1	ALK2	1.099	1.086	0.988171
1739	ML347	ALK1; ALK2; ALK3; ALK6	1.036	1.088	1.05019
1740	AG18	EGFR	1.033	0.9546	0.924105
1741	OAC1	OCT4	1.129	1.016	0.899911
1742	AZD4547	FGFR1; FGFR2; FGFR3; FGFR4	1.005	0.8507	0.846468
1743	kb NB 142-70	PKD1; PKD2; PKD3	1.052	1.059	1.00665
1744	JSH23	NF-κB	1.064	1.033	0.970865
1745	Vidofludimus	Human DHODH	1.045	1.078	1.03158
1746	Spautin-1	USP10; USP13	1.051	1.165	1.10847
1747	GSK3787	PPARδ	1.069	1.069	1
1748	LDN214117	ALK2	1.117	1.153	1.03223
1749	MK-2206 dihydrochloride	Akt1; Akt2; Akt3	0.8	0.7122	0.89025
1750	GNE7915	LRRK2; LRRK2	1.062	0.9621	0.905932
1751	BTB06584	ATPase; Acetohydroxyacid synthase	1.074	1.073	0.999069
1752	FLT3-IN-2	FLT3	1.075	1.03	0.95814
1753	SB225002	CXCR2	1.048	1.054	1.00573
1754	AZD2858	GSK-3	1.073	1.182	1.10158
1755	CZC24832	PI3Kβ; PI3Kγ; PI3Kδ	1.072	1.028	0.958955
1756	PND1186	FAK	0.7834	0.9682	1.23589
1757	DBEQ	p97	1.106	1.068	0.965642
1758	BIX 01294 Trihydrochloride	G9a	1.139	1.085	0.95259
1759	Vistusertib	P-Akt (S473); mTOR; PI3Kα; pS6 (S235/236)	0.6986	0.5935	0.849556
1760	ASP 3026	ALK	0.6398	0.9327	1.4578
1761	L779450	Raf	1.078	1.217	1.12894
1762	YL109	AhR	1.031	1.015	0.984481
1763	Alpelisib	PI3Kα	0.8215	0.7847	0.955204
1764	Filgotinib	JAK1; JAK2; JAK3; Tyk2	1.046	1.034	0.988528
1765	BAY 11-7082	E2-conjugating enzymes; IκBα phosphorylation	1.087	1.066	0.980681
1766	EPZ005687	EZH2	1.057	1.085	1.02649
1767	SRPIN340	SRPK1	1.076	1.148	1.06691
1768	MHY1485	mTOR	1.136	1.19	1.04754
1769	FR180204	ERK1; ERK2	1.04	1.149	1.10481
1770	LDN193189	ALK2; ALK3	1.066	1.261	1.18293
1771	AZ20	ATR; mTOR	1.066	1.003	0.940901
1772	Capmatinib	c-Met	1.048	1.041	0.993321
1773	LDN212854	ALK1; ALK2; ALK3; ALK4; ALK5	1.026	1.185	1.15497
1774	Mdivi 1	Dnm1 GTPase	1.078	1.027	0.95269
1775	NVP 231	CERK	1.042	1.006	0.965451
1776	B-AP15	UCH-L5	0.9916	1.013	1.02158
1777	Alectinib	ALK; ALK (F1174L); ALK (R1275Q); INSR; VEGFR2 (KDR)	0.5916	1.009	1.70554
1778	6H05	K-Ras(G12C)	1.061	1.123	1.05844
1779	WAY262611	Wnt/β-catenin	1.004	1.001	0.997012
1780	Capivasertib	Akt1; Akt2; Akt3; PKA; mTOR (p70S6K)	1.01	0.8294	0.821188
1781	PFI4	BRPF1; BRPF2; BRPF3	1.07	1.102	1.02991
1782	PH797804	p38α; p38β	1.102	0.9262	0.840472
1783	Infigratinib	FGFR1; FGFR2; FGFR3; FGFR3 (K650E); FGFR4	1.012	0.7809	0.77164
1784	NVP-LDE225	Smoothened; Smoothened	1.081	0.993	0.918594
1785	CCT007093	PPM1D	1.113	1.047	0.940701
1786	Ansamitocin P-3	microtubule	0.233	0.4986	2.13991
1787	Bay 11-7085	IκBα phosphorylation	1.089	1.057	0.970615
1788	RN486	BTK	1.063	1.011	0.951082
1789	Molibresib	BET proteins	1.066	1.056	0.990619
1790	Pseudolaric Acid B	p38	1.03	0.9881	0.95932
1791	GSK 5959	BRPF1	1.042	0.9774	0.938004
1792	AT 7519 hydrochloride salt	CDK2/CyclinA; CDK4/CyclinD1; CDK5/p35; CDK9/CyclinT; GSK-3β	1.016	1.023	1.00689
1793	BRD4770	G9a	1.03	1.071	1.03981
1794	Erastin	Ferroptosis	1.087	1.067	0.981601
1795	TAE226	c-Met; FAK; IGF-1R; Insulin Receptor; PYK2	0.4838	0.9261	1.91422
1796	LDN57444	UCH-L1; UCH-L1; UCH-L3	1.096	1.137	1.03741
1797	Gedatolisib	mTOR; PI3Kα; PI3Kγ	0.2596	0.3848	1.48228
1798	GNE9605	LRRK2; LRRK2	1.058	1.014	0.958412
1799	WP1066	JAK2; STAT3	1.05	1.045	0.995238
1800	BMH21	RNA polymerase I	0.8468	0.8246	0.973784
1801	Idelalisib	p110γ; p110δ	1.13	1.002	0.886726
1802	Siramesine hydrochloride	lysosome-destabilizing agent; σ2	1.129	1.054	0.93357
1803	Ro 48-8071 fumarate	Oxidosqualene cyclase	1.069	1.057	0.988775
1804	JIB04	JMJD2A; JMJD2B; JMJD2D; JMJD2E; JARID1A	0.8603	0.7404	0.86063
1805	CHIR99021	GSK-3α; GSK-3β	1.089	1.067	0.979798
1806	TAK632	Aurora B; FGFR3; PDGFRβ; B-Raf; C-Raf	1.074	1.057	0.984171
1807	Nutlin3	p53-MDM2	1.103	1.128	1.02267
1808	PPQ102	CFTR	1.087	1.039	0.955842
1809	Inauhzin	SIRT1	1.069	1.062	0.993452
1810	CI994	HDAC1; HDAC2; HDAC3	0.9683	0.9227	0.952907
1811	XAV939	TNKS1; TNKS2	1.023	0.9822	0.960117
1812	ATB 346	COX-2	1.093	0.9824	0.898811
1813	SGI1027	DNMT1; DNMT3A; DNMT3B	1.096	1.054	0.961679
1814	Kobe0065	Ras-Raf	1.086	0.9824	0.904604
1815	Dabrafenib	B-Raf; B-Raf (V600E); C-Raf	0.8942	1.018	1.13845
1816	SKLB 610	FGFR; PDGFR; VEGFR	1.107	1.131	1.02168
1817	Kobe2602	Ras-Raf	1.09	1.074	0.985321
1818	Pracinostat	HDAC1; HDAC10; HDAC11; HDAC2; HDAC3; HDAC4; HDAC5; HDAC6; HDAC7; HDAC8; HDAC9	0.8719	0.9774	1.121
1819	NSC 405020	MT1-MMP	1.057	1.07	1.0123
1820	Ro 61-8048	KMO; KMO	1.037	0.8976	0.865574
1821	CP466722	ATM	1.041	1.059	1.01729
1822	U0126-EtOH	MEK1; MEK2	1.053	1.015	0.963913
1823	AMG337	Met; Met(H1094R); Met(M1250T); Met(V1092I); Met(Y1230H)	1.062	1.04	0.979284
1824	HIF-PHD Inhibitor II	PHD1; PHD2; PHD3	1.118	1.041	0.931127
1825	Duvelisib	PI3Kα; PI3Kβ; PI3Kγ; PI3Kδ	1.038	0.9394	0.90501
1826	Torin 2	ATM; ATR; DNA-PK; mTOR	0.2184	0.4139	1.89515
1827	RKI1447	ROCK1; ROCK2	1.063	1.211	1.13923
1828	ML 161	PAR-1	1.136	1.125	0.990317
1829	CH5183284	FGFR1; FGFR2; FGFR3; FGFR4	1.009	0.8283	0.820912
1830	Romidepsin	HDAC1; HDAC2	0.05146	0.1157	2.24835
1831	TG003	mCLK1; mCLK2; mCLK4	1.077	0.9575	0.889044
1832	GSK1324726A	BRD2; BRD3; BRD4	0.8635	0.8689	1.00625
1833	BIBS 39	AT2 receptor	1.076	1.156	1.07435
1834	Leupeptin Hemisulfate	Cysteine protease; Serine Protease	1.025	1.06	1.03415
1835	NS398	COX-2	1.114	1.116	1.0018
1836	AZ33	LDHA	1.026	1.068	1.04094
1837	XL388	mTOR; mTORC1; mTORC2; CYP2C9; PI3Kα	1.054	0.9282	0.880645
1838	PF-2545920	PDE10A	1.096	1.073	0.979015
1839	PFI1	BRD2; BRD4	1.125	1.126	1.00089
1840	MG132	20S proteasome, calpain	0.3002	0.4888	1.62825
1841	LMK235	HDAC4; HDAC5	0.7963	0.8418	1.05714
1842	AZD3965	MCT1	1.062	1.108	1.04331
1843	Lorlatinib	ALK; ALK (L1196M); ROS1; ROS1; LTK (TYK1)	0.6588	1.122	1.7031
1844	SB203580	p38 MAPK	1.111	0.9855	0.887039
1845	Bexarotene	RXR	1.047	0.9058	0.865138
1846	CW069	HSET	1.045	1.14	1.09091
1847	TH287 hydrochloride	MTH1	1.093	1.083	0.990851
1848	GSK343	EZH1; EZH2	1.091	1.049	0.961503
1849	EPZ015666	PRMT5	0.9306	0.9729	1.04545
1850	Ro 31-8220 Mesylate	PKCα; PKCβ1; PKCβ2; PKCγ; PKCε	1.042	0.8654	0.830518
1851	Verdinexor	CRM1	0.5549	0.8354	1.5055
1852	Z-FA-FMK	Cysteine protease	1.102	0.9794	0.888748
1853	CVT313	CDK1; CDK2; CDK4	1.029	1.075	1.0447
1854	Brefeldin A	ATPase (HCT 116)	0.0967	0.0894	0.924509
1855	NSC5844	CCR1	1.135	0.9487	0.835859
1856	Belnacasan	Caspase-1; Caspase-4	1.057	1.046	0.989593
1857	AEBSF hydrochloride	Serine Protease	1.134	1.053	0.928571
1858	SGC-CBP30	CREBBP; EP300	1.084	0.9646	0.889852
1859	Remodelin hydrobromide	acetyl-transferase NAT10	1.068	1.09	1.0206
1860	Eptapirone	5-HT1A	1.042	0.9495	0.911228
1861	GSK137647A	GPR120	1.036	1.018	0.982625
1862	L-778123 hydrochloride	Farnesyl transferase (FTase)	0.975	0.8816	0.904205
1863	PIK-inhibitors	PI3K	1.108	1.003	0.905235
1864	SKI II	SphK1	1.059	0.9732	0.91898
1865	Maraviroc	MIP-1α; MIP-1β; RANTES	1.05	0.9776	0.931048
1866	Brevianamide F	Others	1.052	1.062	1.00951
1867	Sirtinol	SIRT1; SIRT2	1.032	0.9763	0.946027
1868	Fluensulfone	Parasite	1.073	0.9976	0.92973
1869	Motesanib	VEGFR1; VEGFR2; VEGFR3	1.045	0.9303	0.890239
1870	Ferrostatin-1	Ferroptosis	1.02	0.9671	0.948137
1871	3-Methyladenine	PI3Kγ; Vps34	1.072	1.056	0.985075
1872	SW044248	Topo I	1.013	1.013	1
1873	PAOA	HDAC	1.058	0.9027	0.853214
1874	BML210	HDAC	1.09	0.9562	0.877248
1875	UF010	HDAC	1.071	0.9619	0.898133
1876	RBC8	GTPases RalA; GTPases RalB	1.023	0.9851	0.962952
1877	Puromycin dihydrochloride	DNA synthesis; 60S ribosome	1.04	0.9446	0.908269
1878	YM201636	p110α; PIKfyve	1.15	0.9861	0.857478
1879	Kevetrin hydrochloride	Mdm2; p53	0.9996	0.9382	0.938575
1880	NS1643	hERG	1.027	0.8258	0.80409
1881	Retinol	Retinol-binding protein	1.071	1.015	0.947712
1882	Flupirtine maleate	NMDA receptor; Potassium Channel	1.023	0.9879	0.965689
1883	Napabucasin	STAT3	0.9533	0.9838	1.03199
1884	GW 441756	CDK2; C-Raf-1; TrkA	0.8828	0.7989	0.904961
1885	(E)-Elafibranor	Syk	0.9968	0.8955	0.898375
1886	TWS119	GSK-3β	0.9962	0.9692	0.972897
1887	Briciclib	Cyclin D1	0.2381	0.5539	2.32633
1888	Nutlin-3a	p53/MDM2	1.031	0.9772	0.947818
1889	DMOG	HIF-PH	1.007	0.9893	0.982423
1890	GNF7	M351T; c-Abl; E255V; G250E; T315I	0.3901	0.2318	0.594207
1891	SSR128129E	FGFR1	1.023	1.012	0.989247
1892	Tivantinib	c-Met	0.9334	0.9916	1.06235
1893	KC7F2	HIF-1α	1.012	0.965	0.953557
1894	MN64	Tankyrase	0.9707	0.9465	0.97507
1895	DB07268	JNK1	1.013	0.9314	0.919447
1896	Oprozomib	20S proteasome; 20S proteasome	0.1765	0.3708	2.10085
1897	Pimelic diphenylamide 106	HDAC	0.9628	0.9663	1.00364
1898	Daprodustat	HIF-PH	1.037	0.908	0.875603
1899	Troglitazone	PPARγ	0.9807	0.9225	0.940655
1900	Metoprolol Succinate	β1-adrenergic receptor	0.9905	0.9017	0.910348
1901	Tandutinib	c-Kit; CSF-1R; FLT3; PDGFRβ; Src	0.9927	0.9859	0.99315
1902	PTACH	HDAC	0.9665	0.9953	1.0298
1903	Sophoricoside	Others	0.9494	0.9554	1.00632
1904	Zoledronic Acid	Rho	0.9442	0.7995	0.846749
1905	Brimonidine Tartrate	α2A-adrenergic receptor	0.9042	0.8461	0.935744
1906	Enoxacin	Topo II; Topo IV	0.9663	0.9918	1.02639
1907	Tamibarotene	RARα; RARβ	0.5823	0.7706	1.32337
1908	Aloperine	Antibiotic	0.944	0.9015	0.954979
1909	Mosapride Citrate	5-HT4	0.9598	0.8122	0.846218
1910	WDR5-0103	WDR5	0.9954	0.8394	0.843279
1911	Valsartan	angiotensin II receptor	0.9826	1.045	1.0635
1912	Amifostine	Others	0.9855	0.9102	0.923592
1913	Guanabenz Acetate	α2A-adrenergic receptor; α2B-adrenergic receptor; α2C-adrenergic receptor	0.9744	0.8813	0.904454
1914	Piribedil	α2-adrenergic; D2; D3	0.9775	0.838	0.857289
1915	Tofacitinib	JAK1; JAK2; JAK3; ROCK2; Lck	1.004	0.8536	0.850199
1916	VX-11e	Aurora A; CDK2; ERK2; FLT3; GSK-3	0.8833	0.8424	0.953696
1917	Malotilate	5-Lipoxygenase	0.9504	0.8838	0.929924
1918	Salidroside	mTOR	0.9956	0.9153	0.919345
1919	Hydroxy Camptothecine	Topo I	0.06913	0.2547	3.68436
1920	Metadoxine	5-HT2B	1.001	0.8883	0.887413
1921	Zaltoprofen	COX-1; COX-2	1.109	1.093	0.985573
1922	Acetovanillone	NADPH oxidase	1.186	1.072	0.903879
1923	Ospemifene	ER	1.076	0.9124	0.847955
1924	Tulobuterol hydrochloride	β2-adrenergic receptor	1.044	0.8562	0.820115
1925	Odanacatib	Cathepsin K (human); Cathepsin K (rabbit)	0.9897	0.9476	0.957462
1926	(+)-Dipentene	Others	1.046	1.028	0.982792
1927	Ozagrel hydrochloride	Thromboxane A2 synthetase	1.146	0.9275	0.809337
1928	Tazarotene	RAR	0.7017	0.7135	1.01682
1929	SZL P1-41	Skp2	1.061	1.007	0.949105
1930	Nefazodone hydrochloride	5-HT	1.108	0.8905	0.8037
1931	Oleanonic Acid	HIV	1.123	1.02	0.908281
1932	Parthenolide	NF-κB	1.106	1.006	0.909584
1933	Trimethoxystilbene	Others	1.055	0.8763	0.830616
1934	Liquiritigenin	ERβ	1.105	0.8515	0.770588
1935	Sophoridine	Topo I	0.9988	0.8857	0.886764
1936	Arteether	CCL4; CCL5; CXCL10; CXCL9	1.061	0.8561	0.80688
1937	Velpatasvir	HCV NS5A	1.099	0.8869	0.807006
1938	Dioscin	Autophagy	1.095	0.8726	0.796895
1939	Wogonoside	GABA	1.079	0.92	0.852641
1940	Scutellarein	Src	1.116	0.9045	0.810484
1941	Cycloastragenol	Telomerase	1.122	0.9733	0.867469
1942	Delapril Hydrochloride	ACE	1.117	1.139	1.0197
1943	Disodium clodronate tetrahydrate	IL-1β; IL-6; TNF-α	1.138	0.9601	0.843673
1944	Perillyl alcohol	Others	1.081	1.156	1.06938
1945	Combretastatin A4	Tubulin β	0.2945	0.6422	2.18065
1946	Eupatilin	Autophagy; PPAR	1.132	1.1	0.971731
1947	Canertinib dihydrochloride	EGFR; HER2/ErbB2	1.123	0.7996	0.712021
1948	Eleutheroside E	NF-κB	1.141	0.9429	0.82638
1949	Jervine	Hedgehog; Smoothened	1.089	0.8988	0.825344
1950	Nuciferine	5-HT2A; 5-HT2B; 5-HT2C; 5-HT7; D5 receptor	0.9848	0.9581	0.972888
1951	Veratramine	Sodium Channel	1.12	0.8944	0.798571
1952	Verbascoside	p53; PARP1; PKC	1.034	1.121	1.08414
1953	Azlocillin sodium	PBPs	1.06	0.9861	0.930283
1954	PP2	EGFR; JAK2; Fyn; Lck; ZAP70	1.05	0.8794	0.837524
1955	Alendronate sodium hydrate	Farnesyl diphosphate synthase	1.009	1.005	0.996036
1956	Siponimod	S1P1; S1P2; S1P3; S1P4; S1P5	1.072	0.9312	0.868657
1957	Fludarabine Phosphate	DNA polymerase α; DNA polymerase δ	1.117	0.9971	0.892659
1958	Cephalotaxine	Antiviral	1.131	0.8726	0.77153
1959	Ravoxertinib	ERK1; ERK2	1.001	0.8842	0.883317
1960	Formoterol Hemifumarate	β2-adrenergic receptor	0.9856	0.8757	0.888494
1961	Sotrastaurin	PKCα; PKCβ1; PKCδ; PKCη; PKCθ	1.171	0.9969	0.851324
1962	Elesclomol	HSP70	0.6314	0.8003	1.2675
1963	MonoMethyl auristatin F	Cytotoxicity( Karpas 299 cell)	0.1921	0.6454	3.35971
1964	ON-01910	PLK1	0.4161	0.655	1.57414
1965	Isosteviol	COX-2; IL-6; NF-κB; Potassium Channel; TNF-α	1.074	1.028	0.957169
1966	PD123319	AT2 receptor	1.129	1.072	0.949513
1967	Xanthohumol	COX	1.116	1.04	0.9319
1968	BMS345541	IKK1; IKK2	1.056	0.9006	0.852841
1969	Stattic	STAT3	1.042	1.034	0.992322
1970	Dorsomorphin dihydrochloride	AMPK	1.085	1.119	1.03134
1971	AZD6738	ATR	1.093	1.044	0.955169
1972	Momordin Ic	MAPK; PI3K	1.102	1.004	0.911071
1973	T0070907	PPARα; PPARγ; PPARδ	1.087	0.8709	0.801196
1974	AG14361	PARP1	1.023	0.995	0.97263
1975	Geldanamycin	HSP90; HSP90; p185	1.018	1.004	0.986248
1976	Licochalcone A	Caspase-3	1.097	1.003	0.914312
1977	Tectoridin	Aldose reductase	1.11	1.032	0.92973
1978	Obacunone	p38 MAPK	1.092	0.9498	0.86978
1979	Cinobufagin	Na+/K+-ATPase	0.4388	0.142	0.32361
1980	(-)-Blebbistatin	non-muscle myosin II ATPases	1.064	0.9551	0.89765
1981	Avadomide	E3 Ligase	1.177	0.9815	0.8339
1982	Ponesimod	S1P1	1.085	1.21	1.11521
1983	Demethylzeylasteral	UGT1A6; UGT2B7	1.07	0.8688	0.811963
1984	PF04418948	PGE2	1.166	0.9258	0.793997
1985	Elemicin	5-HT2A	1.097	1.105	1.00729
1986	Baohuoside I	CXCR4	1.169	1.06	0.906758
1987	eleutheroside-b	NOS	1.132	1.097	0.969081
1988	Icaritin	JAK2; STAT3	1.096	1.048	0.956204
1989	Go 6983	PKCα; PKCβ; PKCγ; PKCδ; PKCζ	1.075	1.016	0.945116
1990	Brigatinib	ALK; EGFR (C797S/del19); FLT3; IGF-1R; ROS1	0.4259	0.7539	1.77013
1991	Epacadostat	IDO1	1.054	1.062	1.00759
1992	NU7441	DNA-PK	1.127	0.8983	0.797072
1993	Ribociclib	CDK4	1.073	0.9397	0.875769
1994	Anlotinib	EGFR	1.11	0.9362	0.843423
1995	CAY10505	PI3Kγ	1.096	0.9996	0.912044
1996	VU 0357017 hydrochloride	M1 mAChR	1.096	1.078	0.983577
1997	3PO	PFKFB3	1.101	1.065	0.967302
1998	Ensartinib	ALK	0.6531	1.004	1.53728
1999	Timosaponin BII	BACE1; Aβ; β-CTF	1.089	0.9834	0.90303
[truncated: 1,117 more rows]
